# Supplementary material for: Nurse compliance with a protocol for safe injectable medication administration: comparison of two multicentre observational studies
Source: PubMed Central journal article supplement — BMJ Open. 2018 Jan 5;8(1):e019648. doi: 10.1136/bmjopen-2017-019648 (PMC5781013; doi:10.1136/bmjopen-2017-019648), 2018-01-05
Supplement: bmjopen-2017-019648.draft_revisions.pdf [file bmjopen-2017-019648.draft_revisions.pdf]

# BMJ Open

BMJ Open is committed to open peer review. As part of this commitment we make the peer review history of every article we publish publicly available.

When an article is published we post the peer reviewers' comments and the authors' responses online. We also post the versions of the paper that were used during peer review. These are the versions that the peer review comments apply to.

The versions of the paper that follow are the versions that were submitted during the peer review process. They are not the versions of record or the final published versions. They should not be cited or distributed as the published version of this manuscript.

BMJ Open is an open access journal and the full, final, typeset and author-corrected version of record of the manuscript is available on our site with no access controls, subscription charges or pay-per-view fees (<http://bmjopen.bmj.com>).

If you have any questions on BMJ Open's open peer review process please email [editorial.bmjopen@bmj.com](mailto:editorial.bmjopen@bmj.com)

# BMJ Open

## Nurse compliance with a protocol for safe injectable medication administration: comparison of two multicenter observational studies.

|                                 |                                                                                                                                                                                                                                                                                                                                                                                                                                                                                                                                                                                                                                                                                                                                 |
|---------------------------------|---------------------------------------------------------------------------------------------------------------------------------------------------------------------------------------------------------------------------------------------------------------------------------------------------------------------------------------------------------------------------------------------------------------------------------------------------------------------------------------------------------------------------------------------------------------------------------------------------------------------------------------------------------------------------------------------------------------------------------|
| Journal:                        | <i>BMJ Open</i>                                                                                                                                                                                                                                                                                                                                                                                                                                                                                                                                                                                                                                                                                                                 |
| Manuscript ID                   | bmjopen-2017-019648                                                                                                                                                                                                                                                                                                                                                                                                                                                                                                                                                                                                                                                                                                             |
| Article Type:                   | Research                                                                                                                                                                                                                                                                                                                                                                                                                                                                                                                                                                                                                                                                                                                        |
| Date Submitted by the Author:   | 18-Sep-2017                                                                                                                                                                                                                                                                                                                                                                                                                                                                                                                                                                                                                                                                                                                     |
| Complete List of Authors:       | Schutijser, Bernadette; Amsterdam Public Health research institute, VU University Medical Center, Dept. of Public and Occupational Health; Klopotoska, Joanna; Amsterdam Public Health research institute, VU University Medical Center, Dept. of Public and Occupational Health Jongerden, Irene; Amsterdam Public Health research institute, VU University Medical Center, Dept. of Public and Occupational Health Spreeuwenberg, Peter; Nederlands Instituut voor Onderzoek van de Gezondheidszorg<br>Wagner, Cordula; Nederlands Instituut voor Onderzoek van de Gezondheidszorg,<br>de Bruijne, Martine; Amsterdam Public Health research institute, VU University Medical Center, Dept. of Public and Occupational Health |
| <b>Primary Subject Heading</b>: | Health services research                                                                                                                                                                                                                                                                                                                                                                                                                                                                                                                                                                                                                                                                                                        |
| Secondary Subject Heading:      | Health services research, Nursing                                                                                                                                                                                                                                                                                                                                                                                                                                                                                                                                                                                                                                                                                               |
| Keywords:                       | Health & safety < HEALTH SERVICES ADMINISTRATION & MANAGEMENT, Protocols & guidelines < HEALTH SERVICES ADMINISTRATION & MANAGEMENT, Quality in health care < HEALTH SERVICES ADMINISTRATION & MANAGEMENT, Clinical audit < HEALTH SERVICES ADMINISTRATION & MANAGEMENT                                                                                                                                                                                                                                                                                                                                                                                                                                                         |
|                                 |                                                                                                                                                                                                                                                                                                                                                                                                                                                                                                                                                                                                                                                                                                                                 |

SCHOLARONE™  
Manuscripts

1  
2  
3 **Nurse compliance with a protocol for safe injectable medication administration: comparison of**  
4 **two multicenter observational studies.**  
5  
6  
7  
8  
9

10 *Bernadette Schutijser<sup>1</sup>, Joanna Klopowska<sup>1</sup>, Irene Jongerden<sup>1</sup>, Peter Spreeuwenberg<sup>2</sup>, Cordula*  
11 *Wagner<sup>1,2</sup>, Martine de Bruijne<sup>1</sup>*  
12

13 <sup>1</sup> Department of Public and Occupational Health, Amsterdam Public Health research institute, VU  
14 University Medical Center, Amsterdam, the Netherlands.

15 <sup>2</sup> NIVEL, Netherlands Institute for Health Services Research, Utrecht, The Netherlands.  
16  
17

18 Corresponding author:

19 Bernadette Schutijser, MSc, RN  
20 VU University Medical Center  
21 Amsterdam Public Health research institute  
22 Department of Public and Occupational Health  
23 Van der Boechorststraat 7, room B-550  
24 1081 BT Amsterdam, The Netherlands  
25  
26

27  
28 Email: b.schutijser@vumc.nl  
29 Telephone: +31(0)20-4449612  
30  
31

32  
33  
34 Word count: 4199

35 **Version: 18-09-2017**  
36  
37  
38  
39  
40  
41  
42  
43  
44  
45  
46  
47  
48  
49  
50  
51  
52  
53  
54  
55  
56  
57  
58  
59  
60

**ABSTRACT****Objectives:**

Medication administration errors with injectable medication have a high risk of causing patient harm. To reduce this risk, all Dutch hospitals implemented a protocol for safe injectable medication administration. Nurse compliance with this protocol was evaluated as low as 19% in 2012. The aim of this second evaluation study was to determine whether nurse compliance had changed over a four year period, what factors were associated over time with protocol compliance, and which strategies have been implemented by hospitals to increase protocol compliance.

**Methods:**

In this prospective observational study, conducted between November 2015 and September 2016, nurses from 16 Dutch hospitals were directly observed during intravenous (IV) medication administration. Protocol compliance was complete if nine protocol proceedings were conducted correctly. Protocol compliance was compared with results from the first evaluation. Multilevel logistic regression analyses were used to assess the associations over time between explanatory variables and complete protocol compliance. Implemented strategies were classified according to the five components of the Systems Engineering Initiative for Patient Safety (SEIPS) model.

**Results:**

A total of 372 IV medication administrations were observed. In comparison to 2012, more proceedings per administration were conducted (mean 7.6, 95% Confidence Interval (CI) 7.5-7.7 versus 7.3, CI 7.3-7.4). No significant change was seen in complete protocol compliance (22% in 2016); compliance with the proceedings 'hand hygiene' and 'check by a second nurse' remained low. In contrast to 2012, the majority of the variance was caused by differences between wards rather than between hospitals. Most implemented improvement strategies targeted the organization component of the SEIPS model.

**Conclusions:**

Compliance with 'hand hygiene', and 'check by a second nurse' need to be further improved in order to increase complete protocol compliance. To do so, interventions focused on nurses and individually tailored to each ward are needed.

**Key-words:** *Health & Safety, Protocols & guidelines, Quality in health care, Clinical audit*

(295 words, without key-words)

**STRENGTHS AND LIMITATIONS OF THIS STUDY**

- Comprehensive observational study on nurse compliance with the protocol for safe injectable medication administration based on a total of 372 direct observations of intravenous (IV) medication administrations within a representative random sample of 16 Dutch hospitals.
- This study provides insight in protocol compliance changes over a four year period by a comparison with the results from the first evaluation study conducted in 2011/2012.
- In addition to compliance rates, an overview of implemented hospital strategies was obtained to determine what efforts Dutch hospitals made to improve protocol compliance.
- In this study, medication administration errors and potential harm resulting from these errors, were not measured.

For peer review only

## INTRODUCTION

Injectable medication therapy is considered an essential component of current health care delivery. Over 90% of all hospitalized patients receive some form of this therapy.[1] Injectable medication therapy comprises of medication that is administered directly into body tissue or the circulatory system.[2] It includes primarily intravenous (IV) medication infusions and injections, but also other administration routes such as subcutaneous and intramuscular injections. The benefits of IV medication, such as an immediate therapeutic effect, and the possibility to reach therapeutic drug levels in a short period of time, provide at the same time a high risk for patient harm.[1, 3-6] This high risk arises from the fact that errors with IV medication are almost irreversible. Errors with IV medication occur frequently during hospital admission. The probability of making at least one error at any stage of the IV medication process is 73%.[6] Besides, most errors occur during medication administration. These medication administration errors (MAEs) can be defined as 'deviations of a drug from a physician's prescription, the hospital's policy or the manufacturer's instructions'.[7] MAEs with IV medication occur most often with insulins, anesthetics, and anticoagulants,[8] and it is five times more likely that a MAE occurs when IV medication is administered compared to non-IV medication.[4]

Using a protocol for safe administration of injectable medication contributes to a reduction in medication errors in hospitals.[9-13] In Dutch hospitals, a protocol for safe administration of injectable medication was implemented in 2009 as part of the National Patient Safety Program.[14] This prevailing protocol contains 35 proceedings for preparing and 25 proceedings for administering injectable medication and is based on the 'five rights' of safe medication administration (right patient, right medication, right dose, right route, right time).[3] The goal of the National Patient Safety Program is to achieve 100% compliance with this protocol.

Between November 2011 and December 2012, Schilp et al. (2014) conducted a prospective observational study in 19 Dutch hospitals to evaluate the implementation of the Dutch protocol for safe administration of injectable medication.[15] In total, 2154 IV medication administrations by nurses were directly observed, monthly, during a 12 month period, and complete compliance with the protocol was observed in 19% of the observations. The least conducted proceedings were found to be: 'patient identification', 'hand hygiene', and 'check by a second nurse'. Schilp et al. (2014) concluded that the implementation of the protocol was inadequate and recommended that more time was needed to increase protocol implementation.

In response to the results of the evaluation study of 2012, Dutch hospitals - supported by the Dutch associations of nurses and hospital pharmacists - proposed follow-up actions to improve protocol compliance. For example, appointing an injectable medication nurse champion who's responsibility would be to supervise the implementation of the protocol on hospital and ward level.[16] In addition, barcode medication administration (BCMA) systems were introduced and increasingly used in Dutch hospitals. A BCMA system enables nurses to scan the barcode on the patients' wristband and/or medication label to improve compliance with patient identification. Implementation of BCMA systems in hospitals have been associated with a decrease in MAEs.[17] Also, the protocol compliance was a focus of external safety audits by the Dutch Inspectorate of Health Care. Whether these various follow-up actions had impact on nurse compliance with the protocol for safe injectable medication administration, is unknown.

1  
2  
3  
4 Since the most recent evaluation study was conducted four years ago, and tracking  
5 performance is helpful in determining protocol implementation,[18] we conducted a second  
6 prospective observational study to evaluate the current implementation of the protocol for safe  
7 injectable medication administration in Dutch hospitals. In addition, we wanted to know which  
8 factors are associated over time with complete protocol compliance, since compliance can be  
9 influenced by various characteristics (i.e. organizational, individual, and environmental).[19, 20]  
10 Therefore, the aims of this study were: 1) to determine whether complete protocol compliance, and  
11 compliance with individual proceedings has changed compared to the first evaluation study  
12 conducted in 2011/2012, 2) to investigate which hospital and administration factors are associated  
13 over time with complete protocol compliance, and with three individual protocol proceedings as  
14 compared to the first evaluation, and 3) to provide an overview of improvement strategies  
15 implemented by hospitals to increase protocol compliance.  
16  
17  
18  
19  
20  
21  
22  
23  
24  
25  
26  
27  
28  
29  
30  
31  
32  
33  
34  
35  
36  
37  
38  
39  
40  
41  
42  
43  
44  
45  
46  
47  
48  
49  
50  
51  
52  
53  
54  
55  
56  
57  
58  
59  
60

## METHODS

### Design and Setting

For the purpose of this second evaluation, a prospective observational study was conducted in 16 Dutch hospitals from November 2015 to September 2016. These 16 hospitals included one university hospital, six tertiary teaching hospitals, and nine general hospitals. The hospitals were randomly selected to participate and originated from the representative (stratified on area and type of hospital) sample of 19 hospitals which participated in the first evaluation in 2011/2012. Of these 19 hospitals, 13 agreed to participate in the second evaluation. To assure a representative measurement for all Dutch hospitals and to gain a sufficient sample size for comparison with the first evaluation, three new hospitals were selected from a new random sample. The main reasons not to participate in the second evaluation were: time restraints due to the implementation of a new hospital Electronic Health Record (EHR) system, and the fact that a similar measurement had recently been conducted by hospital staff. The STROBE guideline for reporting observational studies was used to enhance accurate and complete reporting of this study.[21]

### Participants

Nurses working on three hospital wards - Intensive Care (IC), Internal Medicine, and (General) Surgery - were directly observed during the administration of IV medication. These three ward types were considered to be representative of protocol compliance in the whole hospital. All (trainee) nurses involved in the administration of IV medication on the study wards were eligible for this study. This study did not fall within the scope of the Dutch Medical Research (Human Subjects) Act, because nurses were not subject to procedures or required to follow rules of behavior. The medical ethics committee gave a waiver for the requirement of informed consent. Nevertheless, verbal consent from the nurses and (wherever possible) the patients was obtained to conduct the observation. Nurses were aware that they were observed during medication administration, but they were unaware of which proceedings were being observed.

### Data collection

Data collection was similar to the first evaluation study.[15] In summary, to determine complete protocol compliance and compliance with individual proceedings, direct observations were conducted for patients  $\geq 18$  years of age during the IV medication rounds from 6AM to 10PM. Parenteral nutrition, intravenous chemotherapy, and acute medications were not observed because for these medications other administration protocols apply. At each hospital, one trained nurse researcher (BS), conducted the observations during two consecutive weekdays. A standardized observation form was used to evaluate performances of the individual proceedings. The form included the nine most important and identifiable administration proceedings from the protocol, pre-determined and described by an expert team (Table 1). All correctly conducted proceedings were marked on the observation form. Moreover, a minimum of three nurses per ward and a maximum of three administrations per nurse were observed, to correct for between-person variation.



**Table 1: Protocol proceedings for administering injectable medication\***

| Step                              | Explanation                                                                                                                  |
|-----------------------------------|------------------------------------------------------------------------------------------------------------------------------|
| <b>1. Check medication</b>        | Checking the drug on the basis of a medication list or distribution list.                                                    |
| <b>2. Prepare administration</b>  | Preparation of administration: setting pump and speed of injection.                                                          |
| <b>3. Collect materials</b>       | Gathering the needed materials and checking the administration label.                                                        |
| <b>4. Patient identification</b>  | Identifying the patient either electronically or by checking the name, date of birth, patient number and type of medication. |
| <b>5. Hand hygiene</b>            | Hand disinfection before administration or wearing gloves during administration.                                             |
| <b>6. Check flow infusion</b>     | Checking the intravenous medication line before administering the medication.                                                |
| <b>7. Check pump mode</b>         | Checking or setting the pump mode before administering medication.                                                           |
| <b>8. Check by a second nurse</b> | Having a second nurse check the patient, medication, administration route, and administration rate.                          |
| <b>9. Sign medication order</b>   | As the administrator, signing the medication order.                                                                          |

\*As published in Schilp et al. (2014)[15]

To detect a 10% improvement in protocol compliance at a 5% significance level, at least 300 observations were needed during the second evaluation ( $\beta=0.8$ ). This means 20-21 observations per hospital and 6-7 observations per ward. Consequently, only one data collection moment per hospital was needed and planned. During the first evaluation, data were collected during 10 moments (once a month) per hospital to follow process variation over different months and calculate an average compliance rate.

### Protocol compliance

The primary outcomes were complete protocol compliance with the Dutch injectable medication protocol and compliance with three individual protocol proceedings: 'patient identification', 'hand hygiene', and 'check by a second nurse'. These proceedings were the three least conducted protocol proceedings during the first evaluation. Each observed IV medication administration was scored (0-9), and then dichotomized into complete compliance (9 safety proceedings conducted) and incomplete compliance ( $\leq 8$  safety proceedings conducted).[15] In addition, the mean number and percentage of correctly conducted individual proceedings were calculated.

### Factors associated with protocol compliance

To determine factors associated over time with complete protocol compliance and selected individual protocol proceedings, additional variables were registered on the observation form: type of hospital (university, tertiary, general), type of department (general surgery, internal medicine, intensive care), time of administration (morning (5AM-12PM), afternoon (12PM-6PM), and evening (after 6PM)), type of administration (by IV infusion, bolus IV injection or IV syringe pump), and name and type of medication.

### Improvement strategies implemented to increase protocol compliance

To identify improvement strategies implemented by the hospitals, two short interviews were conducted with a quality and safety officer and the head or senior nurse of each ward. During the

1  
2  
3 first interview conducted during the intake, questions regarding the availability of an injectable  
4 medication champion, injectable medication education programs, and interruption prevention  
5 strategies (i.e. do-not-disturb vests) were asked. The second interview followed after the  
6 observations and comprised questions regarding the availability and use of information technology  
7 to support the injectable medication administration process. In addition, local injectable medication  
8 administration protocols were collected to identify other potential improvement strategies. The  
9 identified strategies were classified according to the five components of the work system as  
10 described in the Systems Engineering Initiative for Patient Safety (SEIPS) model: organization,  
11 technology and tools, person, tasks, and environment.[22-24] The SEIPS model provides a  
12 comprehensive theoretical framework for understanding interactions between the components in  
13 the work system, processes (e.g. protocol compliance) and outcomes (e.g. MAEs) in health care.[25]  
14  
15

### 16 17 **Data analysis**

18 All results collected on the observation forms were entered in an online database: NETQuestionnaire.  
19 Descriptive statistics were used to describe hospital type, ward type, administration time,  
20 administration type, and medication type. Differences between mean number of conducted protocol  
21 proceedings were tested with one-way analysis of variance (ANOVA) statistics. Differences in the  
22 protocol compliance (complete protocol compliance: yes or no) were tested with Chi-square  
23 statistics.  
24  
25

26  
27 To assess the associations over time between potential explanatory variables (i.e. hospital  
28 type, ward type, and administration time) and protocol compliance, univariate multilevel logistic  
29 regression analyses were conducted for four dependent variables: complete protocol compliance  
30 (yes/no), patient identification compliance (yes/no), hand hygiene compliance (yes/no), and check by  
31 a second nurse compliance (yes/no).[26] A three-level multilevel structure was used, whereby the  
32 observations were clustered within wards and the wards within hospitals. The explanatory variables  
33 were used as independent variables. The fixed effects for the first evaluation were the average value  
34 of the intercepts. The fixed effects for the second evaluation were the regression coefficients to the  
35 extent that the second evaluation deviated from the first evaluation. In all analyses, a corrected  
36 model was used with adjustment for the other two explanatory variables.  
37  
38

39  
40 In addition, the between hospital and ward level variance was split into two elements, one  
41 for the first, and one for the second evaluation. Also the covariation between both evaluations was  
42 modelled at the hospital and ward level. This resulted in intra class correlations (ICCs) for each  
43 evaluation separately, which indicated whether the relative contribution of the hospital and ward  
44 levels differed between both evaluations. Based on the variances and covariance, the correlation  
45 between participated wards was calculated.  
46  
47

48 Descriptive analyses were conducted using IBM SPSS Statistics 20 (IBM Corporation), and the  
49 multilevel analyses using MlwiN V.2.30 (University of Bristol). The multilevel logistic models were  
50 calculated using Penalized Quasi Likelihood (PQL) second order (or when this failed, first order), with  
51 constrained level 1 variance. For all analyses, p-values  $\leq 0.05$  were considered statistically significant.  
52  
53  
54  
55  
56  
57  
58  
59

## RESULTS

In total, 372 IV medication administrations were observed, with a range of 20-28 observations per hospital (Table 2). Most observations had been conducted at general hospitals (57%), internal medicine (35%) and IC wards (35%), during the afternoon (65%), and of administrations by IV infusion (74%).

**Table 2:** Descriptive statistics of IV medication observations during the two evaluation studies.

|                                           | <b>First evaluation<br/>2011/2012<br/>N observations (%)</b> | <b>Second evaluation<br/>2015/2016<br/>N observations (%)</b> |
|-------------------------------------------|--------------------------------------------------------------|---------------------------------------------------------------|
| <b>Number of observations</b>             | 2154                                                         | 372                                                           |
| <b>Number of hospitals</b>                | 19                                                           | 16                                                            |
| <b>Range of observations per hospital</b> | 70 - 196                                                     | 20 - 28                                                       |
| <b>Type of hospital</b>                   |                                                              |                                                               |
| University                                | 297 (13.8%)                                                  | 22 (5.9%)                                                     |
| Tertiary                                  | 750 (34.8%)                                                  | 139 (37.4%)                                                   |
| General                                   | 1107 (51.4%)                                                 | 211 (56.7%)                                                   |
| <b>Type of department</b>                 |                                                              |                                                               |
| Internal Medicine                         | 643 (29.9%)                                                  | 129 (34.7%)                                                   |
| (General) Surgery                         | 771 (35.8%)                                                  | 112 (30.1%)                                                   |
| Intensive Care                            | 671 (31.2%)                                                  | 131 (35.2%)                                                   |
| Other                                     | 69 (3.2%)                                                    | 0 (0%)                                                        |
| <b>Administration time</b>                |                                                              |                                                               |
| Morning (6AM-12PM)                        | 771 (35.8%)                                                  | 92 (24.7%)                                                    |
| Afternoon (12PM-6PM)                      | 1257 (58.4%)                                                 | 243 (65.3%)                                                   |
| Evening (after 6PM)                       | 126 (5.8%)                                                   | 37 (9.9%)                                                     |
| <b>Type of medication (most common)</b>   |                                                              |                                                               |
| Antibiotics                               | 1323 (61.4%)                                                 | 236 (63.4%)                                                   |
| Analgesics                                | 167 (7.8%)                                                   | 38 (10.2%)                                                    |
| Gastrointestinal medication               | 178 (8.3%)                                                   | 16 (4.3%)                                                     |
| Anesthetics                               | 27 (1.3%)                                                    | 16 (4.3%)                                                     |
| Electrolytes                              | 83 (3.9%)                                                    | 14 (3.8%)                                                     |
| Corticosteroids                           | 85 (3.9%)                                                    | 11 (3.0%)                                                     |
| <b>Type of administration</b>             |                                                              |                                                               |
| By IV syringe pump                        | 29 (1.3%)                                                    | 48 (12.9%)                                                    |
| By bolus IV injection                     | 66 (3.1%)                                                    | 51 (13.7%)                                                    |
| By IV infusion                            | 2059 (95.6%)                                                 | 273 (73.4%)                                                   |

Data is presented as n (%), unless stated otherwise. IV = Intravenous

### Protocol compliance

Table 3 shows the mean number of correctly conducted protocol proceedings and percentages of IV medication administrations with complete protocol compliance during both evaluations. On average, more proceedings per IV medication administration were conducted during the second evaluation compared with the first evaluation: 7.6 (95% Confidence Interval (CI):7.5-7.7) versus 7.3 (CI:7.3-7.4),

( $p < 0.001$ ). However, no significant change was seen in complete protocol compliance during the second evaluation compared with the first evaluation: 22.3% (CI:18.1%-26.5%) versus 19.4% (CI:17.7%-21.1%), ( $p = 0.194$ ).

**Table 3:** Comparison of the first and second evaluation study in conducting the complete protocol.

|                                      | First evaluation<br>2011/2012 | Second evaluation<br>2015/2016 | p-value |
|--------------------------------------|-------------------------------|--------------------------------|---------|
| Conducted proceedings, mean (CI)     | 7.3 (7.3-7.4)                 | 7.6 (7.5-7.7)                  | <0.001* |
| Complete protocol compliance, % (CI) | 19.4 (17.7-21.1)              | 22.3 (18.1-25.5)               | 0.194†  |

\* tested by one-way analysis of variances (ANOVA) test, † tested by Chi-Square ( $\chi^2$ ) test, CI = 95% Confidence Interval

Three proceedings were least often conducted: 'patient identification' (80.1%), 'hand hygiene' (63.2%), and 'check by a second nurse' (47.3%)(Figure 1). Compliance rates with the other six proceedings varied between 93% and 100%.

Compliance with 'patient identification' improved significantly from 61% (CI:58.0%-62.1%) in the first evaluation to 80% (CI:76.1%-84.2%) in the second evaluation,  $p < 0.001$ . During the second evaluation, patient identification was conducted in three ways. First, 49% of the nurses identified their patient by a physical check (e.g. asking the patients' name, and/or date of birth, or by checking information on the patients' wristband). Second, 16% of the nurses identified the patient by using a barcode scanner in addition to the physical check, or by only using a barcode scanner. Third, in 15% of the observations, all on IC wards, nurse-patient ratio was one nurse per patient. Hence, patient identification was scored as conducted in all these observations.

Compliance with the proceedings 'hand hygiene', and 'check by a second nurse' remained unchanged. The 'check by a second nurse' comprises of four sub-checks: double check on 'right patient', 'right medication', 'right administration route' and 'right administration rate'. During the second evaluation, double checking the right 'patient' ( $n = 255$ , 69%), 'administration route' ( $n = 227$ , 61%) and 'administration rate' ( $n = 177$ , 48%) were conducted less often compared to double checking the right 'medication' ( $n = 353$ , 95%).

#### Factors associated with protocol compliance

The univariate associations over time between three potential explanatory variables (e.g. type of hospital, ward type, and time of administration) and four dependent variables (complete protocol compliance, compliance with patient identification, compliance with hand hygiene, and compliance with check by a second nurse), were investigated. A positive association was found between all three explanatory variables and compliance with 'patient identification'. Compliance with the proceeding 'patient identification' improved significantly over time for all the different administration times (morning, afternoon, and evening)(Table 4), all the different ward types (intensive care, internal medicine, and (general) surgery)(Supplemental Table 5), and in tertiary teaching hospitals (Supplemental Table 6). Other investigated hospital and administration related variables were not associated with complete protocol compliance or compliance with the other two analyzed individual proceedings. Furthermore, multilevel analyses showed that the hospital variance became very small and was estimated as 0 (Table 4). On the other hand, ward variance increased. For example, 0% (ICC=0.00) of the total variance in the association between 'patient identification compliance' and

'administration time' can be explained by individual hospitals and 50% (ICC=49.70) by individual wards (Table 4). During the first evaluation, opposite results were found, in which the ICCs of hospital variance were high, and ICCs of ward variance were low. In addition, at ward level, the correlation between the two evaluations was 0.52, indicating that wards having had a high compliance in the first evaluation, also had a high compliance in the second evaluation. Vice versa, wards that had a low compliance in the first evaluation, also had a low compliance in the second evaluation.

**Table 4:** Multilevel analyses of the association between administration time and compliance with the proceeding 'patient identification' during the first and second evaluation.

|                                             | First evaluation<br>2011/2012 |                   | Second evaluation<br>2015/2016 |               |
|---------------------------------------------|-------------------------------|-------------------|--------------------------------|---------------|
|                                             | N                             | Estimate (SE)     | N                              | Estimate (SE) |
| <b>Fixed effects</b>                        |                               |                   |                                |               |
| Patient identification in morning           | 770                           | 0.19 (0.46)       | 92                             | 1.97 (0.61)*  |
| Patient identification in afternoon         | 1256                          | 0.39 (0.45)       | 243                            | 1.58 (0.53)*  |
| Patient identification in evening           | 126                           | 0.39 (0.55)       | 37                             | 1.64 (0.76)*  |
| <b>Random effects</b>                       |                               |                   |                                |               |
| Hospital level ICC                          |                               | 38.09             |                                | 0             |
| Hospital level variance                     |                               | 3.24 (1.21)       |                                | 0 (0)         |
| Hospital level covariance and correlation   |                               | 0 (0); 0          |                                |               |
| Department level ICC                        |                               | 23.27             |                                | 49.70         |
| Department level variance                   |                               | 1.13 (0.34)       |                                | 2.40 (0.78)   |
| Department level covariance and correlation |                               | 0.85 (0.46); 0.52 |                                |               |

\* $p < 0.05$ , ICC=Intra Class Correlation, SE=Standard Error

**Supplemental Table 5:** Multilevel analyses of the association between ward type and compliance with the proceeding 'patient identification' during the first and second evaluation.

|                                                  | First evaluation<br>2011/2012 |                   | Second evaluation<br>2015/2016 |               |
|--------------------------------------------------|-------------------------------|-------------------|--------------------------------|---------------|
|                                                  | N                             | Estimate (SE)     | N                              | Estimate (SE) |
| <b>Fixed effects</b>                             |                               |                   |                                |               |
| Patient identification on internal medicine ward | 643                           | -0.05 (0.51)      | 129                            | 1.58 (0.64)*  |
| Patient identification on surgery ward           | 771                           | 0.27 (0.50)       | 112                            | 2.13 (0.67)*  |
| Patient identification on intensive care ward    | 671                           | 0.74 (0.51)       | 131                            | 1.32 (0.65)*  |
| <b>Random effects</b>                            |                               |                   |                                |               |
| Hospital level ICC                               |                               | 38.42             |                                | 0             |
| Hospital level variance                          |                               | 3.28 (1.22)       |                                | 0 (0)         |
| Hospital level covariance and correlation        |                               | 0 (0); 0          |                                |               |
| Department level ICC                             |                               | 23.09             |                                | 48.33         |
| Department level variance                        |                               | 1.14 (0.34)       |                                | 2.24 (0.75)   |
| Department level covariance and correlation      |                               | 0.83 (0.46); 0.52 |                                |               |

\* $p < 0.05$ , ICC=Intra Class Correlation, SE=Standard Error

**Supplemental Table 6:** Multilevel analyses of the association between hospital type and compliance with the proceeding 'patient identification' during the first and second evaluation.

|                                                | First evaluation<br>2011/2012 |                   | Second evaluation<br>2015/2016 |               |
|------------------------------------------------|-------------------------------|-------------------|--------------------------------|---------------|
|                                                | N                             | Estimate (SE)     | N                              | Estimate (SE) |
| <b>Fixed effects</b>                           |                               |                   |                                |               |
| Patient identification in university hospitals | 297                           | 0.61 (1.35)       | 22                             | 2.56 (1.95)   |
| Patient identification in tertiary hospitals   | 750                           | 0.02 (0.72)       | 139                            | 2.09 (0.82)*  |
| Patient identification in general hospitals    | 1107                          | 0.45 (0.61)       | 211                            | 1.27 (0.68)   |
| <b>Random effects</b>                          |                               |                   |                                |               |
| Hospital level ICC                             |                               | 37.53             |                                | 0             |
| Hospital level variance                        |                               | 3.14 (1.18)       |                                | 0 (0)         |
| Hospital level covariance and correlation      |                               | 0 (0); 0          |                                |               |
| Department level ICC                           |                               | 23.18             |                                | 48.71         |
| Department level variance                      |                               | 1.12 (0.34)       |                                | 2.30 (0.76)   |
| Department level covariance and correlation    |                               | 0.82 (0.45); 0.52 |                                |               |

\* $p < 0.05$ , ICC=Intra Class Correlation, SE=Standard Error

### Improvement strategies implemented to increase protocol compliance

Figure 2 shows nine identified strategies implemented by hospitals with the aim to improve compliance with the injectable medication administration protocol. Most strategies were classified according to the SEIPS model as targeting the organization component (n=3), followed by tasks (n=2), and technology and tools components (n=2). Only one intervention targeted the person and one the environment component.

Hospitals implemented on average six strategies, ranging between four and nine strategies. Organization component strategies were: appointing an injectable medication champion (15 participating hospitals), conducting internal audits (14 participating hospitals), and having a buddy-system in which two nurses double check their buddies' IV medication administrations (9 participating hospitals). Most appointed injectable medication champions were hospital pharmacists and the way in which this task was performed varied greatly between hospitals. Barcode medication administration (BCMA) systems (8 participating hospitals), and smart pumps (7 participating hospitals) were the implemented tools & technology improvement strategies. Smart pumps are infusion pumps with software that creates a library of medication administration protocols.[27] A personal component related strategy included training and education (e.g. e-learning modules, and introduction modules) for nurses to enhance their knowledge (16 participating hospitals). Task related strategies included: shifting the tasks of injectable medication preparation from nurses on hospital wards to pharmacy technicians in the (central) hospital pharmacy (11 participating hospitals) and adjusting the timing of the check by a second nurse to the beginning of a shift (10 participating hospitals). Finally, having policy regarding the recognisability of nurses during injectable medication administration (12 participating hospitals) was the only environmental component related strategy identified. Most combined strategies were training and education, and appointing an injectable medication champion.

## DISCUSSION

Compliance with individual proceedings of the Dutch protocol on administering injectable medication has improved over four years, but complete protocol compliance did not significantly change. In 19% of the observations in 2011/2012, the protocol was completely conducted, compared to 22% in 2015/2016 ( $p = 0.194$ ). In contrast to the first evaluation study, differences in protocol compliance between wards were greater, and differences between hospitals were smaller. Furthermore, according to the SEIPS model, most improvement strategies targeted the organization component of the injectable medication administration process.

Compliance with the proceeding 'patient identification' increased significantly to an average of 80%. Using a BCMA system to electronically identify patients may have contributed to the higher compliance rate of this proceeding in our study. Taliercio et al. (2014) showed that nurses experience using a BCMA system to identify patients as a major advantage.[28] In our study, a BCMA system was implemented as a strategy in eight (50%) participating hospitals, and used in 16% of all observations. Since an increasing number of Dutch hospitals will implement a BCMA system in the next few years and using BCMA will be further integrated in daily nursing practice, we expect that compliance with this proceeding will further increase. A reason for non-compliance with this proceeding can be that nurses believe they know their patient well enough not to ask the patients' name and date of birth.[29] Other observational studies on medication administration reported lower compliance rates (33%-80%), but did not specify whether identification was supported by a BCMA system.[30-35]

Compliance with the proceeding 'hand hygiene' remained unchanged (63%). This may be explained by the lack of improvement strategies specifically targeting hand hygiene compliance in the participating hospitals. The compliance of 63% in our study is comparable to the study of Helder et al. (2016) which showed a hand disinfection rate during medication administration of 58% after a mutual feedback intervention.[36] Improving hand hygiene remains a challenge in many hospital processes, not only during medication administration. A recent review showed that the overall mean hand hygiene compliance rate after interventions was 57%.[37] Huis et al. (2012) explored determinants of hand hygiene improvement strategies and showed that addressing knowledge, awareness, action control, and facilitation is not enough to improve hand hygiene compliance.[38] Baseline compliance rates of hand hygiene vary strongly in the literature (20-60%).[39] Also, the increased compliance with hand hygiene appears temporary in most intervention studies. Huis et al. (2012) recommended that social influence, attitude, self-efficacy, and attention (person component of SEIPS) should be taken into account in new strategies, and that they should preferably be focused on the whole nursing team.[38]

Compliance with the proceeding 'check by a second nurse' also remained unchanged (47%). Of all four sub-checks of this proceeding (e.g. 'right patient', 'right medication', 'right administration route', and 'right administration rate'), the sub-check on 'right patient' and 'right medication' were most often conducted. These sub-checks are supported by barcode scanning systems while the sub-checks on 'right administration route' and 'right administration rate' are not. Therefore, for these checks on route and rate of IV infusion, a second nurse at the patients' bedside was necessary. This is a task that depends on nurse capacity and/or workload. Alsulami et al. (2012) described that staff shortage can be a barrier for correctly conducting the check by a second nurse.[40] We identified intervention strategies to increase compliance with this proceeding in the participating hospitals,

1  
2  
3 such as adjusting the timing of the check by a second nurse and having a buddy-system. These  
4 strategies were implemented in respectively ten (63%) and nine (56%) participating hospitals and  
5 seemed not to stimulate compliance. Qualitative studies on the check by a second nurse showed that  
6 most health care professionals preferred the double check[40] and that future studies should focus  
7 on training and education, automating the proceeding, and seeing the check by a second nurse as a  
8 method to share opinions.[41]  
9

10  
11 Using the SEIPS model for classifying strategies implemented by the hospitals revealed that  
12 most strategies targeted the organization of the injectable medication administration process. Less  
13 strategies targeted the person and environment. This is in contrast with Berdot et al. (2015), who  
14 showed that most interventions aiming to reduce MAEs targeted technology and tools (e.g.  
15 automated medication dispensing systems, BCMA systems) and the person (e.g. interactive CD-ROM  
16 program, or simulation-based learning).[42] This can be explained by the fact that Berdot et al.  
17 (2012) included only seven studies, mostly randomized controlled trials, which had MAE rates as  
18 outcome measure. Our observational study identified current improvement strategies used in daily  
19 practice. Knowing that strategies are most often complex and multifaceted, it is recommended to  
20 determine potential barriers prior to implementing a strategy.[42] These barriers can be found in all  
21 SEIPS components. Apparently, Dutch hospitals have been trying to overcome barriers in the  
22 injectable medication process by implementing mostly organizational strategies on hospital level.  
23 This is, however, not enough to increase protocol compliance. Since most variation was seen on ward  
24 level, rather than hospital level, future strategies should be tailored to individual wards. It is  
25 important to focus these strategies on individuals (e.g. nurses, patients, families) and the  
26 environment. On the other hand, the protocol itself can also be a focus for discussion. Since two  
27 evaluation studies concluded that the implementation of the protocol has not yet been  
28 accomplished, it may be necessary to take a critical look at which proceedings are essential, and  
29 whether the proceedings reflect all SEIPS components.  
30  
31  
32  
33  
34  
35

36 One of the strengths of this study is that more than 20% of all Dutch hospitals participated in  
37 one of the two evaluation studies, 19 during the first evaluation, and 16 during the second  
38 evaluation. This random and representative sample ensures that the results can be generalized to  
39 the Dutch hospital setting. Furthermore, a similar observation list, observation procedure, and  
40 training of researchers were used during both evaluations and 13 hospitals participated in both  
41 evaluations. Therefore, we could compare the two evaluations reliably. However, four uncertainties  
42 may have limited the generalizability of our results. Firstly, this second study comprised of one data  
43 collection moment compared to 10 data collection moments in 2011/2012. As a consequence, the  
44 compliance rate reflect one moment in time, compared with an average compliance rate.  
45 Nevertheless, we conducted more than the intended 300 observations, and on this basis, we think  
46 the results reflect current nursing practice. Secondly, 96% of all observations were conducted by one  
47 researcher, which could have created error of leniency or severity (i.e. rating observations in  
48 particular positively or negatively).[43] However, in our study, using one observer ensured that all  
49 administrations were measured in the same way and it appeared that the compliance rates were in  
50 line with previous studies. Thirdly, the fact that nurses were aware of being observed may have  
51 resulted in more compliance. As a consequence, compliance rates could have been overestimated.  
52 This so called Hawthorne effect is a known challenge within observational studies.[44] To minimize  
53 this effect in our study, the researcher was discrete during observations and did not give  
54  
55  
56  
57  
58  
59  
60



1  
2  
3 performance feedback during or after observations. Fourthly, not all injectable medications were  
4 included in the observations, only IV medications. Since chemotherapy, and less invasive injectable  
5 medication administration routes, such as intramuscular and subcutaneous injections, are  
6 increasingly used in hospitals, it would be recommendable to also observe these injectable  
7 medications.  
8  
9

10 In conclusion, our results show that conducting all nine proceedings included in the protocol  
11 for safe injectable medication administration by Dutch hospital nurses remains challenging.  
12 Importantly, compliance with patient identification during IV medication administration has  
13 improved and implementing BCMA systems may have contributed to this finding. Therefore, further  
14 implementation of BCMA systems in hospitals is recommended. Compliance with 'hand hygiene', and  
15 'check by a second nurse' need to be further improved in order to increase complete protocol  
16 compliance and reduce the risk of MAEs. To improve compliance with these proceedings, other  
17 interventions are needed, preferably focused on nurses, and individually tailored to each ward.  
18  
19  
20  
21  
22  
23  
24  
25  
26  
27  
28  
29  
30  
31  
32  
33  
34  
35  
36  
37  
38  
39  
40  
41  
42  
43  
44  
45  
46  
47  
48  
49  
50  
51  
52  
53  
54  
55  
56  
57  
58  
59  
60

1  
2  
3 **Acknowledgements** The authors gratefully acknowledge all participating hospitals, and the nurse  
4 interns, and pharmacy intern for their cooperation during the data collection. We also acknowledge  
5 Catherine Combee - Duffy, MANP for critical reading the article as native speaker.  
6

7  
8 **Contributors** BS, JK, MdB, and CW designed the study and developed the study protocol. BS and JK  
9 organized the data collection. BS conducted the observations. BS, JK, and PS performed statistical  
10 analyses and interpreted the analytical results. BS, JK, and IJ wrote the manuscript. JK, MdB, and CW  
11 supervised the study. All authors made critical revisions and approved the final version of the  
12 manuscript.  
13

14  
15 **Funding** This work was supported by the Dutch Ministry of Health, Welfare, and Sports.  
16

17 **Competing Interests** None.  
18

19  
20 **Ethics approval** This study has been approved by the Medical Ethics Committee of the VU University  
21 Medical Center Amsterdam, with protocol number 2015/430. The protocol number of the first  
22 evaluation study was 2011/359 and has been approved by the same Medical Ethics Committee.  
23

24  
25 **Provenance and peer review** Not commissioned; externally peer reviewed.  
26

27 **Data sharing statement** No additional data are available.  
28

29  
30 **Open Access** This is an Open Access article distributed in accordance with the Creative Commons  
31 Attribution Non Commercial (CC BY-NC 4.0) license, which permits others to distribute, remix, adapt,  
32 build upon this work non-commercially, and license their derivative works on different terms,  
33 provided the original work is properly cited and the use is non-commercial. See:  
34 <http://creativecommons.org/licenses/by-nc/4.0/>  
35  
36  
37  
38  
39  
40  
41  
42  
43  
44  
45  
46  
47  
48  
49  
50  
51  
52  
53  
54  
55  
56  
57  
58  
59  
60

## REFERENCES

1. Institute for Safe Medication Practices (ISMP). Safe Practice Guidelines for Adult IV Push Medications. A compilation of safe practices from the ISMP Adult IV Push Medication Safety Summit. Horsham, PA, United States of America, 2015.
2. Doyle GR, McCutcheon JA. *Parenteral Medication Administration*. Clinical Procedures for Safer Patient Care: British Columbia Institute of Technology (BCIT), 2015.
3. Hughes RG, Blegen MA. *Medication Administration Safety Patient Safety and Quality: An Evidence-Based Handbook for Nurses*. Rockville MD, 2008.
4. McLeod MC, Barber N, Franklin BD. Methodological variations and their effects on reported medication administration error rates. *BMJ Qual Saf* 2013;22(4):278-89.
5. Keers RN, Williams SD, Cooke J, *et al*. Understanding the causes of intravenous medication administration errors in hospitals: a qualitative critical incident study. *BMJ Open* 2015;5(3):e005948.
6. McDowell SE, Mt-Isa S, Ashby D, *et al*. Republished paper: Where errors occur in the preparation and administration of intravenous medicines: a systematic review and Bayesian analysis. *Postgrad Med J* 2010;86(1022):734-8.
7. Taxis K, Barber N. Causes of intravenous medication errors: an ethnographic study. *Qual Saf Health Care* 2003;12(5):343-7.
8. Damen NL, Baines R, Wagner C, *et al*. Medication-related adverse events during hospitalization: a retrospective patient record review study in The Netherlands. *Pharmacoepidemiol Drug Saf* 2017;26(1):32-39.
9. Roelofsen EE, Schuitenmaker MG, Swart EL, *et al*. Veiligheid op recept: een protocol voor toediening gereed maken van parenteralia voor verpleegkundigen. *Pharma Weekbl* 2007;142(1):162-6.
10. van den Bemt PM, Fijn R, van der Voort PH, *et al*. Frequency and determinants of drug administration errors in the intensive care unit. *Crit Care Med* 2002;30(4):846-50.
11. Tromp M, Natsch S, van Achterberg T. The preparation and administration of intravenous drugs before and after protocol implementation. *Pharm World Sci* 2009;31(3):413-20.
12. Nguyen HT, Pham HT, Vo DK, *et al*. The effect of a clinical pharmacist-led training programme on intravenous medication errors: a controlled before and after study. *BMJ Qual Saf* 2014;23(4):319-24.
13. Chedoe I, Molendijk H, Hospes W, *et al*. The effect of a multifaceted educational intervention on medication preparation and administration errors in neonatal intensive care. *Arch Dis Child Fetal Neonatal Ed* 2012;97(6):F449-55.
14. VMS. High Risk Medication: preparation and administration of parenteralia. Utrecht, The Netherlands, 2009.
15. Schilp J, Boot S, de Blok C, *et al*. Protocol compliance of administering parenteral medication in Dutch hospitals: an evaluation and cost estimation of the implementation. *BMJ Open* 2014;4(12):e005232.
16. de Blok C, Koster E, Schilp J, *et al*. Implementation VMS Safety Program: Evaluation study in Dutch hospitals. (in Dutch: Implementatie VMS Veiligheidsprogramma: Evaluatieonderzoek in Nederlandse ziekenhuizen. Utrecht/Amsterdam, 2013.
17. Poon EG, Keohane CA, Yoon CS, *et al*. Effect of bar-code technology on the safety of medication administration. *N Engl J Med* 2010;362(18):1698-707.
18. Kim J, Bates DW. Medication administration errors by nurses: adherence to guidelines. *J Clin Nurs* 2013;22(3-4):590-8.
19. Francke AL, Smit MC, de Veer AJ, *et al*. Factors influencing the implementation of clinical guidelines for health care professionals: a systematic meta-review. *BMC Med Inform Decis Mak* 2008;8:38.
20. Borgert MJ, Goossens A, Dongelmans DA. What are effective strategies for the implementation of care bundles on ICUs: a systematic review. *Implement Sci* 2015;10:119.

- 1
  - 2
  - 3
  - 4
  - 5
  - 6
  - 7
  - 8
  - 9
  - 10
  - 11
  - 12
  - 13
  - 14
  - 15
  - 16
  - 17
  - 18
  - 19
  - 20
  - 21
  - 22
  - 23
  - 24
  - 25
  - 26
  - 27
  - 28
  - 29
  - 30
  - 31
  - 32
  - 33
  - 34
  - 35
  - 36
  - 37
  - 38
  - 39
  - 40
  - 41
  - 42
  - 43
  - 44
  - 45
  - 46
  - 47
  - 48
  - 49
  - 50
  - 51
  - 52
  - 53
  - 54
  - 55
  - 56
  - 57
  - 58
  - 59
  - 60
21. von Elm E, Altman DG, Egger M, *et al.* The Strengthening the Reporting of Observational Studies in Epidemiology (STROBE) statement: guidelines for reporting observational studies. *J Clin Epidemiol* 2008;61(4):344-9.
22. Carayon P, Schoofs Hundt A, Karsh BT, *et al.* Work system design for patient safety: the SEIPS model. *Qual Saf Health Care* 2006;15 Suppl 1:i50-8.
23. Frith KH. Medication errors in the intensive care unit: literature review using the SEIPS model. *AACN Adv Crit Care* 2013;24(4):389-404.
24. Al-Jumaili AA, Doucette WR. Comprehensive Literature Review of Factors Influencing Medication Safety in Nursing Homes: Using a Systems Model. *J Am Med Dir Assoc* 2017;18(6):470-88.
25. Carayon P, Wetterneck TB, Rivera-Rodriguez AJ, *et al.* Human factors systems approach to healthcare quality and patient safety. *Appl Ergon* 2014;45(1):14-25.
26. Snijders TAB, Bosker RJ. *Multilevel Analysis: An Introduction to Basic and Advanced Multilevel Modeling*. 2nd ed. London: Sage Publishers, 2012.
27. Institute for Safe Medication Practices (ISMP). Proceedings from the ISMP summit on the use of smart infusion pumps: guidelines for safe implementation and use. Horsham, PA, United States of America, 2009.
28. Taliercio V, Schachner B, Borbolla D, *et al.* The expectations of nurses about the implementation of a Barcoded Medication Administration System: a qualitative study. *Stud Health Technol Inform* 2014;205:191-5.
29. Dougherty L, Sque M, Crouch R. Decision-making processes used by nurses during intravenous drug preparation and administration. *J Adv Nurs* 2012;68(6):1302-11.
30. Choo J, Johnston L, Manias E. Nurses' medication administration practices at two Singaporean acute care hospitals. *Nurs Health Sci* 2013;15(1):101-8.
31. Barthelemy I, Huet E, Guilbeault M, *et al.* Compliance with inpatient drug use process steps: a cross-sectional observational study. *J Pharm Pract* 2013;26(6):551-5.
32. Alemanni J, Touzin K, Bussieres JF, *et al.* An assessment of drug administration compliance in a university hospital centre. *J Eval Clin Pract* 2010;16(5):920-6.
33. Raja Lope RJ, Boo NY, Rohana J, *et al.* A quality assurance study on the administration of medication by nurses in a neonatal intensive care unit. *Singapore Med J* 2009;50(1):68-72.
34. Westbrook JI, Rob MI, Woods A, *et al.* Errors in the administration of intravenous medications in hospital and the role of correct procedures and nurse experience. *BMJ Qual Saf* 2011;20(12):1027-34.
35. Harkanen M, Kervinen M, Ahonen J, *et al.* An observational study of how patients are identified before medication administrations in medical and surgical wards. *Nurs Health Sci* 2015;17(2):188-94.
36. Helder OK, Kornelisse RF, Reiss IK, *et al.* Disinfection practices in intravenous drug administration. *Am J Infect Control* 2016;44(6):721-3.
37. Kingston L, O'Connell NH, Dunne CP. Hand hygiene-related clinical trials reported since 2010: a systematic review. *J Hosp Infect* 2016;92(4):309-20.
38. Huis A, van Achterberg T, de Bruin M, *et al.* A systematic review of hand hygiene improvement strategies: a behavioural approach. *Implement Sci* 2012;7:92.
39. Erasmus V, Daha TJ, Brug H, *et al.* Systematic review of studies on compliance with hand hygiene guidelines in hospital care. *Infect Control Hosp Epidemiol* 2010;31(3):283-94.
40. Alsulami Z, Conroy S, Choonara I. Double checking the administration of medicines: what is the evidence? A systematic review. *Arch Dis Child* 2012;97(9):833-7.
41. Hewitt T, Chreim S, Forster A. Double checking: a second look. *J Eval Clin Pract* 2016;22(2):267-74.
42. Berdot S, Roudot M, Schramm C, *et al.* Interventions to reduce nurses' medication administration errors in inpatient settings: A systematic review and meta-analysis. *Int J Nurs Stud* 2016;53:342-50.

- 1
- 2
- 3 43. Polit DF, Beck CT. *Collecting Structured Data*. Nursing Research Generating and Assessing
- 4 Evidence for Nursing Practice. 8th ed. Philadelphia: Wolters Kluwer/Lippincott/Williams &
- 5 Wilkins, 2008.
- 6 44. McCambridge J, Witton J, Elbourne DR. Systematic review of the Hawthorne effect: new
- 7 concepts are needed to study research participation effects. *J Clin Epidemiol* 2014;67(3):267-
- 8 77.
- 9
- 10
- 11
- 12
- 13
- 14
- 15
- 16
- 17
- 18
- 19
- 20
- 21
- 22
- 23
- 24
- 25
- 26
- 27
- 28
- 29
- 30
- 31
- 32
- 33
- 34
- 35
- 36
- 37
- 38
- 39
- 40
- 41
- 42
- 43
- 44
- 45
- 46
- 47
- 48
- 49
- 50
- 51
- 52
- 53
- 54
- 55
- 56
- 57
- 58
- 59
- 60

For peer review only

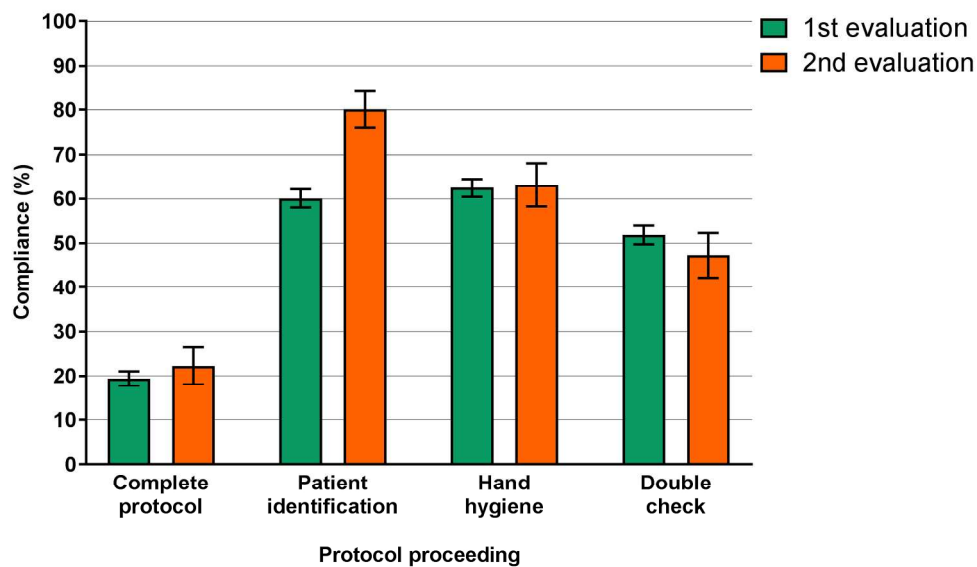

**Figure 1:** Compliance percentages with the complete protocol and three individual proceedings within the first (n=2154) and second (n=372) evaluation.<sup>†</sup> Results are presented with 95% Confidence Interval. † = tested by Chi-square ( $X^2$ ) test. Compliance with the six other proceedings varied between 93%-100%, and was significantly increased for 'prepare administration', 'check flow infusion', and 'check pump mode', and significantly decreased for 'check medication'.

201x120mm (300 x 300 DPI)

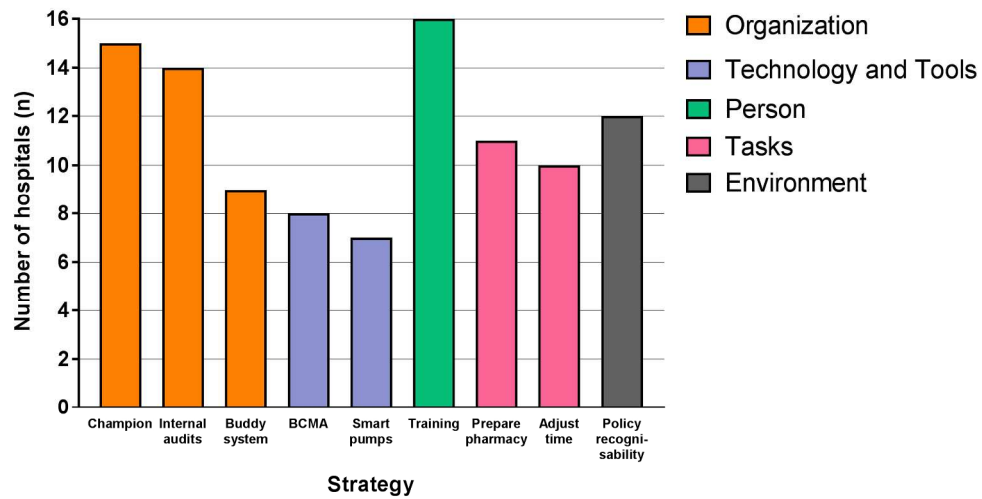

**Figure 2:** Identified strategies implemented by the hospitals during the second evaluation (n=16 hospitals), classified according to the individual components of the SEIPS model (e.g. organization, technology & tools, person, tasks, and environment). BCMA = Barcode Medication Administration.

215x114mm (300 x 300 DPI)

**STROBE Statement**—Checklist of items that should be included in reports of *cross-sectional studies*

|                              | <b>Item No</b> | <b>Recommendation</b>                                                                                                                                                                                        | <b>Page number</b> |
|------------------------------|----------------|--------------------------------------------------------------------------------------------------------------------------------------------------------------------------------------------------------------|--------------------|
| <b>Title and abstract</b>    | 1              | (a) Indicate the study's design with a commonly used term in the title or the abstract                                                                                                                       | 1-2                |
|                              |                | (b) Provide in the abstract an informative and balanced summary of what was done and what was found                                                                                                          | 2                  |
| <b>Introduction</b>          |                |                                                                                                                                                                                                              |                    |
| Background/rationale         | 2              | Explain the scientific background and rationale for the investigation being reported                                                                                                                         | 4                  |
| Objectives                   | 3              | State specific objectives, including any prespecified hypotheses                                                                                                                                             | 5                  |
| <b>Methods</b>               |                |                                                                                                                                                                                                              |                    |
| Study design                 | 4              | Present key elements of study design early in the paper                                                                                                                                                      | 6                  |
| Setting                      | 5              | Describe the setting, locations, and relevant dates, including periods of recruitment, exposure, follow-up, and data collection                                                                              | 6                  |
| Participants                 | 6              | (a) Give the eligibility criteria, and the sources and methods of selection of participants                                                                                                                  | 6                  |
| Variables                    | 7              | Clearly define all outcomes, exposures, predictors, potential confounders, and effect modifiers. Give diagnostic criteria, if applicable                                                                     | 7-8                |
| Data sources/<br>measurement | 8*             | For each variable of interest, give sources of data and details of methods of assessment (measurement). Describe comparability of assessment methods if there is more than one group                         | 6-8                |
| Bias                         | 9              | Describe any efforts to address potential sources of bias                                                                                                                                                    | 14-15              |
| Study size                   | 10             | Explain how the study size was arrived at                                                                                                                                                                    | 7                  |
| Quantitative variables       | 11             | Explain how quantitative variables were handled in the analyses. If applicable, describe which groupings were chosen and why                                                                                 | 7-8                |
| Statistical methods          | 12             | (a) Describe all statistical methods, including those used to control for confounding                                                                                                                        | 8                  |
|                              |                | (b) Describe any methods used to examine subgroups and interactions                                                                                                                                          | 8                  |
|                              |                | (c) Explain how missing data were addressed                                                                                                                                                                  | n.a.               |
|                              |                | (d) If applicable, describe analytical methods taking account of sampling strategy                                                                                                                           | n.a.               |
|                              |                | (e) Describe any sensitivity analyses                                                                                                                                                                        | 8                  |
| <b>Results</b>               |                |                                                                                                                                                                                                              |                    |
| Participants                 | 13*            | (a) Report numbers of individuals at each stage of study—eg numbers potentially eligible, examined for eligibility, confirmed eligible, included in the study, completing follow-up, and analysed            | 9                  |
|                              |                | (b) Give reasons for non-participation at each stage                                                                                                                                                         | 6                  |
|                              |                | (c) Consider use of a flow diagram                                                                                                                                                                           | n.a.               |
| Descriptive data             | 14*            | (a) Give characteristics of study participants (eg demographic, clinical, social) and information on exposures and potential confounders                                                                     | 9                  |
|                              |                | (b) Indicate number of participants with missing data for each variable of interest                                                                                                                          | 9                  |
| Outcome data                 | 15*            | Report numbers of outcome events or summary measures                                                                                                                                                         | 9                  |
| Main results                 | 16             | (a) Give unadjusted estimates and, if applicable, confounder-adjusted estimates and their precision (eg, 95% confidence interval). Make clear which confounders were adjusted for and why they were included | 9-12               |



|                          |    |                                                                                                                                                                            |       |
|--------------------------|----|----------------------------------------------------------------------------------------------------------------------------------------------------------------------------|-------|
|                          |    | (b) Report category boundaries when continuous variables were categorized                                                                                                  | 9-12  |
|                          |    | (c) If relevant, consider translating estimates of relative risk into absolute risk for a meaningful time period                                                           | n.a.  |
| Other analyses           | 17 | Report other analyses done—eg analyses of subgroups and interactions, and sensitivity analyses                                                                             | 12    |
| <b>Discussion</b>        |    |                                                                                                                                                                            |       |
| Key results              | 18 | Summarise key results with reference to study objectives                                                                                                                   | 13    |
| Limitations              | 19 | Discuss limitations of the study, taking into account sources of potential bias or imprecision. Discuss both direction and magnitude of any potential bias                 | 14-15 |
| Interpretation           | 20 | Give a cautious overall interpretation of results considering objectives, limitations, multiplicity of analyses, results from similar studies, and other relevant evidence | 13-14 |
| Generalisability         | 21 | Discuss the generalisability (external validity) of the study results                                                                                                      | 14-15 |
| <b>Other information</b> |    |                                                                                                                                                                            |       |
| Funding                  | 22 | Give the source of funding and the role of the funders for the present study and, if applicable, for the original study on which the present article is based              | 16    |

n.a. = not applicable

\*Give information separately for exposed and unexposed groups.

**Note:** An Explanation and Elaboration article discusses each checklist item and gives methodological background and published examples of transparent reporting. The STROBE checklist is best used in conjunction with this article (freely available on the Web sites of PLoS Medicine at <http://www.plosmedicine.org/>, Annals of Internal Medicine at <http://www.annals.org/>, and Epidemiology at <http://www.epidem.com/>). Information on the STROBE Initiative is available at [www.strobe-statement.org](http://www.strobe-statement.org).

# BMJ Open

## Nurse compliance with a protocol for safe injectable medication administration: comparison of two multicenter observational studies.

|                                 |                                                                                                                                                                                                                                                                                                                                                                                                                                                                                                                                                                                                                                                                                                                                 |
|---------------------------------|---------------------------------------------------------------------------------------------------------------------------------------------------------------------------------------------------------------------------------------------------------------------------------------------------------------------------------------------------------------------------------------------------------------------------------------------------------------------------------------------------------------------------------------------------------------------------------------------------------------------------------------------------------------------------------------------------------------------------------|
| Journal:                        | <i>BMJ Open</i>                                                                                                                                                                                                                                                                                                                                                                                                                                                                                                                                                                                                                                                                                                                 |
| Manuscript ID                   | bmjopen-2017-019648.R1                                                                                                                                                                                                                                                                                                                                                                                                                                                                                                                                                                                                                                                                                                          |
| Article Type:                   | Research                                                                                                                                                                                                                                                                                                                                                                                                                                                                                                                                                                                                                                                                                                                        |
| Date Submitted by the Author:   | 01-Nov-2017                                                                                                                                                                                                                                                                                                                                                                                                                                                                                                                                                                                                                                                                                                                     |
| Complete List of Authors:       | Schutijser, Bernadette; Amsterdam Public Health research institute, VU University Medical Center, Dept. of Public and Occupational Health; Klopotoska, Joanna; Amsterdam Public Health research institute, VU University Medical Center, Dept. of Public and Occupational Health Jongerden, Irene; Amsterdam Public Health research institute, VU University Medical Center, Dept. of Public and Occupational Health Spreeuwenberg, Peter; Nederlands Instituut voor Onderzoek van de Gezondheidszorg<br>Wagner, Cordula; Nederlands Instituut voor Onderzoek van de Gezondheidszorg,<br>de Bruijne, Martine; Amsterdam Public Health research institute, VU University Medical Center, Dept. of Public and Occupational Health |
| <b>Primary Subject Heading</b>: | Health services research                                                                                                                                                                                                                                                                                                                                                                                                                                                                                                                                                                                                                                                                                                        |
| Secondary Subject Heading:      | Health services research, Nursing                                                                                                                                                                                                                                                                                                                                                                                                                                                                                                                                                                                                                                                                                               |
| Keywords:                       | Health & safety < HEALTH SERVICES ADMINISTRATION & MANAGEMENT, Protocols & guidelines < HEALTH SERVICES ADMINISTRATION & MANAGEMENT, Quality in health care < HEALTH SERVICES ADMINISTRATION & MANAGEMENT, Clinical audit < HEALTH SERVICES ADMINISTRATION & MANAGEMENT                                                                                                                                                                                                                                                                                                                                                                                                                                                         |
|                                 |                                                                                                                                                                                                                                                                                                                                                                                                                                                                                                                                                                                                                                                                                                                                 |

SCHOLARONE™  
Manuscripts

1  
2  
3 **Nurse compliance with a protocol for safe injectable medication administration: comparison of**  
4 **two multicenter observational studies.**  
5  
6  
7  
8  
9

10 *Bernadette Schutijser<sup>1</sup>, Joanna Klopowska<sup>1</sup>, Irene Jongerden<sup>1</sup>, Peter Spreeuwenberg<sup>2</sup>, Cordula*  
11 *Wagner<sup>1,2</sup>, Martine de Bruijne<sup>1</sup>*  
12

13 <sup>1</sup> Department of Public and Occupational Health, Amsterdam Public Health research institute, VU  
14 University Medical Center, Amsterdam, the Netherlands.

15 <sup>2</sup> NIVEL, Netherlands Institute for Health Services Research, Utrecht, The Netherlands.  
16  
17

18 Corresponding author:

19 Bernadette Schutijser, MSc, RN  
20 VU University Medical Center  
21 Amsterdam Public Health research institute  
22 Department of Public and Occupational Health  
23 Van der Boechorststraat 7, room B-550  
24 1081 BT Amsterdam, The Netherlands  
25  
26

27  
28 Email: b.schutijser@vumc.nl  
29 Telephone: +31(0)20-4449612  
30  
31

32  
33  
34 Word count: 4495

35 **Version: 01-11-2017**  
36  
37  
38  
39  
40  
41  
42  
43  
44  
45  
46  
47  
48  
49  
50  
51  
52  
53  
54  
55  
56  
57  
58  
59  
60

**ABSTRACT****Objectives:**

Medication administration errors with injectable medication have a high risk of causing patient harm. To reduce this risk, all Dutch hospitals implemented a protocol for safe injectable medication administration. Nurse compliance with this protocol was evaluated as low as 19% in 2012. The aim of this second evaluation study was to determine whether nurse compliance had changed over a four year period, what factors were associated over time with protocol compliance, and which strategies have been implemented by hospitals to increase protocol compliance.

**Methods:**

In this prospective observational study, conducted between November 2015 and September 2016, nurses from 16 Dutch hospitals were directly observed during intravenous (IV) medication administration. Protocol compliance was complete if nine protocol proceedings were conducted correctly. Protocol compliance was compared with results from the first evaluation. Multilevel logistic regression analyses were used to assess the associations over time between explanatory variables and complete protocol compliance. Implemented strategies were classified according to the five components of the Systems Engineering Initiative for Patient Safety (SEIPS) model.

**Results:**

A total of 372 IV medication administrations were observed. In comparison to 2012, more proceedings per administration were conducted (mean 7.6, 95% Confidence Interval (CI) 7.5-7.7 versus 7.3, CI 7.3-7.4). No significant change was seen in complete protocol compliance (22% in 2016); compliance with the proceedings 'hand hygiene' and 'check by a second nurse' remained low. In contrast to 2012, the majority of the variance was caused by differences between wards rather than between hospitals. Most implemented improvement strategies targeted the organization component of the SEIPS model.

**Conclusions:**

Compliance with 'hand hygiene', and 'check by a second nurse' need to be further improved in order to increase complete protocol compliance. To do so, interventions focused on nurses and individually tailored to each ward are needed.

**Key-words:** *Health & Safety, Protocols & guidelines, Quality in health care, Clinical audit*

(295 words, without key-words)

**STRENGTHS AND LIMITATIONS OF THIS STUDY**

- Comprehensive observational study on nurse compliance with the protocol for safe injectable medication administration based on a total of 372 direct observations of intravenous (IV) medication administrations within a representative random sample of 16 Dutch hospitals.
- This study provides insight in protocol compliance changes over a four year period by a comparison with the results from the first evaluation study conducted in 2011/2012.
- In addition to compliance rates, an overview of implemented hospital strategies was obtained to determine what efforts Dutch hospitals made to improve protocol compliance.
- In this study, medication administration errors and potential harm resulting from these errors, were not measured.

For peer review only

## INTRODUCTION

Injectable medication therapy is considered an essential component of current health care delivery. Over 90% of all hospitalized patients receive some form of this therapy.[1] Injectable medication therapy comprises of medication that is administered directly into body tissue or the circulatory system.[2] It includes primarily intravenous (IV) medication infusions and injections, but also other administration routes such as subcutaneous and intramuscular injections. The benefits of IV medication, such as an immediate therapeutic effect, and the possibility to reach therapeutic drug levels in a short period of time, provide at the same time a high risk for patient harm.[1, 3-6] This high risk arises from the fact that errors with IV medication are almost irreversible. Errors with IV medication occur frequently during hospital admission. The probability of making at least one error at any stage of the IV medication process is 73%.[6] Besides, most errors occur during medication administration. These medication administration errors (MAEs) can be defined as 'deviations of a drug from a physician's prescription, the hospital's policy or the manufacturer's instructions'.[7] It is five times more likely that a MAE occurs when IV medication is administered compared to non-IV medication.[4]

Using a protocol for safe administration of injectable medication contributes to a reduction in medication errors in hospitals.[8-12] In Dutch hospitals, a protocol for safe administration of injectable medication was implemented in 2009 as part of the National Patient Safety Program.[13] This prevailing protocol contains 35 proceedings for preparing and 25 proceedings for administering injectable medication and is based on the 'five rights' of safe medication administration (right patient, right medication, right dose, right route, right time).[3] The goal of the National Patient Safety Program is to achieve 100% compliance with this protocol. In other countries, comparable protocols have been implemented and protocol steps such as 'patient identification' and 'hand hygiene' are generally seen as important and included in these protocols.[14-16]

Between November 2011 and December 2012, Schilp et al. (2014) conducted a prospective observational study in 19 Dutch hospitals to evaluate the implementation of the Dutch protocol for safe administration of injectable medication.[17] In total, 2154 IV medication administrations by nurses were directly observed, monthly, during a 12 month period, and complete compliance with the protocol was observed in 19% of the observations. The least conducted proceedings were found to be: 'patient identification', 'hand hygiene', and 'check by a second nurse'. Schilp et al. (2014) concluded that the implementation of the protocol was inadequate and recommended that more time was needed to increase protocol implementation.

In response to the results of the evaluation study of 2012, Dutch hospitals - supported by the Dutch associations of nurses and hospital pharmacists - proposed follow-up actions to improve protocol compliance. For example, appointing an injectable medication nurse champion who's responsibility would be to supervise the implementation of the protocol on hospital and ward level.[18] In addition, barcode medication administration (BCMA) systems were introduced and increasingly used in Dutch hospitals. A BCMA system enables nurses to scan the barcode on the patients' wristband and/or medication label to improve compliance with patient identification. Implementation of BCMA systems in hospitals have been associated with a decrease in MAEs.[19] Also, the protocol compliance was a focus of external safety audits by the Dutch Inspectorate of

1  
2  
3 Health Care. Whether these various follow-up actions had impact on nurse compliance with the  
4 protocol for safe injectable medication administration, is unknown.  
5

6 Since the most recent evaluation study was conducted four years ago, and tracking  
7 performance is helpful in determining protocol implementation,[14] we conducted a second  
8 prospective observational study to evaluate the current implementation of the protocol for safe  
9 injectable medication administration in Dutch hospitals. In addition, we wanted to know which  
10 factors are associated over time with complete protocol compliance, since compliance can be  
11 influenced by various characteristics (i.e. organizational, individual, and environmental).[20, 21]  
12 Therefore, the aims of this study were: 1) to determine whether complete protocol compliance, and  
13 compliance with individual proceedings has changed compared to the first evaluation study  
14 conducted in 2011/2012, 2) to investigate which hospital and administration factors are associated  
15 over time with complete protocol compliance, and with three individual protocol proceedings as  
16 compared to the first evaluation, and 3) to provide an overview of improvement strategies  
17 implemented by hospitals to increase protocol compliance.  
18  
19  
20  
21  
22  
23  
24  
25  
26  
27  
28  
29  
30  
31  
32  
33  
34  
35  
36  
37  
38  
39  
40  
41  
42  
43  
44  
45  
46  
47  
48  
49  
50  
51  
52  
53  
54  
55  
56  
57  
58  
59  
60

## METHODS

### Design and Setting

For the purpose of this second evaluation, a prospective observational study was conducted in 16 Dutch hospitals from November 2015 to September 2016. These 16 hospitals included one university hospital, six tertiary teaching hospitals, and nine general hospitals. The hospitals were randomly selected to participate and originated from the representative (stratified on area and type of hospital) sample of 19 hospitals which participated in the first evaluation in 2011/2012. Of these 19 hospitals, 13 agreed to participate in the second evaluation. To assure a representative measurement for all Dutch hospitals and to gain a sufficient sample size for comparison with the first evaluation, three new hospitals were selected from a new random sample. The main reasons not to participate in the second evaluation were: time restraints due to the implementation of a new hospital Electronic Health Record (EHR) system, and the fact that a similar measurement had recently been conducted by hospital staff. The STROBE guideline for reporting observational studies was used to enhance accurate and complete reporting of this study.[22]

### Participants

Nurses working on three hospital wards - Intensive Care (IC), Internal Medicine, and (General) Surgery - were directly observed during the administration of IV medication. These three ward types were considered to be representative of protocol compliance in the whole hospital. All (trainee) nurses involved in the administration of IV medication on the study wards were eligible for this study. This study did not fall within the scope of the Dutch Medical Research (Human Subjects) Act, because nurses were not subject to procedures or required to follow rules of behavior. The medical ethics committee gave a waiver for the requirement of informed consent. Nevertheless, verbal consent from the nurses and (wherever possible) the patients was obtained to conduct the observation. Nurse managers of the participating wards were fully informed about the purpose of the study. Nurses were informed about the goal of the observations (correct administration of injectable medication) but not about the specific protocol proceedings being observed, in order to prevent bias (Hawthorne effect).[23] However, nurses could be aware of the observed proceedings on the observation form, since all proceedings follow the current protocol which is publicly accessible in all hospitals. Participation in the study was voluntary and anonymous for nurses; if a nurse did not want to participate, then he/she was not observed.

### Data collection

Data collection was similar to the first evaluation study.[17] In summary, to determine complete protocol compliance and compliance with individual proceedings, direct observations were conducted for patients  $\geq 18$  years of age during the IV medication rounds from 6AM to 10PM. Parenteral nutrition, intravenous chemotherapy, and acute medications were not observed because for these medications other administration protocols apply. At each hospital, one trained nurse researcher (BS), conducted the observations during two consecutive weekdays. A standardized observation form was used to evaluate performances of the individual proceedings. The form included the nine most important and identifiable administration proceedings from the protocol, pre-determined and described by an expert team (Table 1). All correctly conducted proceedings were marked on the observation form. Moreover, a minimum of three nurses per ward and a maximum of three administrations per nurse were observed, to correct for between-person variation.



**Table 1: Protocol proceedings for administering injectable medication\***

| Step                       | Explanation                                                                                                                  |
|----------------------------|------------------------------------------------------------------------------------------------------------------------------|
| 1. Check medication        | Checking the drug on the basis of a medication list or distribution list.                                                    |
| 2. Prepare administration  | Preparation of administration: setting pump and speed of injection.                                                          |
| 3. Collect materials       | Gathering the needed materials and checking the administration label.                                                        |
| 4. Patient identification  | Identifying the patient either electronically or by checking the name, date of birth, patient number and type of medication. |
| 5. Hand hygiene            | Hand disinfection before administration or wearing gloves during administration.                                             |
| 6. Check flow infusion     | Checking the intravenous medication line before administering the medication.                                                |
| 7. Check pump mode         | Checking or setting the pump mode before administering medication.                                                           |
| 8. Check by a second nurse | Having a second nurse check the patient, medication, administration route, and administration rate.                          |
| 9. Sign medication order   | As the administrator, signing the medication order.                                                                          |

\*As published in Schilp et al. (2014)[17]

To detect a 10% improvement in protocol compliance at a 5% significance level, at least 300 observations were needed during the second evaluation ( $\beta=0.8$ ). This means 20-21 observations per hospital and 6-7 observations per ward. Consequently, only one data collection moment per hospital was needed and planned. During the first evaluation, data were collected during 10 moments (once a month) per hospital to follow process variation over different months and calculate an average compliance rate.

### Protocol compliance

The primary outcome was the complete protocol compliance with the Dutch injectable medication protocol. Each observed IV medication administration was scored (0-9), and then dichotomized into complete compliance (9 safety proceedings conducted) and incomplete compliance ( $\leq 8$  safety proceedings conducted).[17] The secondary outcomes were the mean number and percentage of correctly conducted individual proceedings, in particular compliance with: 'patient identification', 'hand hygiene', and 'check by a second nurse'. These three proceedings were the three least conducted protocol proceedings during the first evaluation.

### Factors associated with protocol compliance

To determine factors associated over time with complete protocol compliance and selected individual protocol proceedings, additional variables were registered on the observation form: type of hospital (university, tertiary, general), type of department (general surgery, internal medicine, intensive care), time of administration (morning (5AM-12PM), afternoon (12PM-6PM), and evening (after 6PM)), type of administration (by IV infusion, bolus IV injection or IV syringe pump), and name and type of medication.

### Improvement strategies implemented to increase protocol compliance

To identify improvement strategies implemented by the hospitals, two short interviews were conducted with a quality and safety officer and the head or senior nurse of each ward. During the

1  
2  
3 first interview conducted during the intake, questions regarding the availability of an injectable  
4 medication champion, injectable medication education programs, and interruption prevention  
5 strategies (i.e. do-not-disturb vests) were asked. The second interview followed after the  
6 observations and comprised questions regarding the availability and use of information technology  
7 to support the injectable medication administration process. In addition, local injectable medication  
8 administration protocols were collected to identify other potential improvement strategies. The  
9 identified strategies were classified according to the five components of the work system as  
10 described in the Systems Engineering Initiative for Patient Safety (SEIPS) model: organization,  
11 technology and tools, person, tasks, and environment.[24-26] The SEIPS model provides a  
12 comprehensive theoretical framework for understanding interactions between the components in  
13 the work system, processes (e.g. protocol compliance) and outcomes (e.g. MAEs) in health care.[27]

### 17 **Data analysis**

18 All results collected on the observation forms were entered in an online database:  
19 NETQuestionnaires. Descriptive statistics were used to describe hospital type, ward type,  
20 administration time, administration type, and medication type. Differences between mean number  
21 of conducted protocol proceedings were tested with one-way analysis of variance (ANOVA) statistics.  
22 Differences in the protocol compliance (complete protocol compliance: yes or no) were tested with  
23 Chi-square statistics.  
24  
25

26  
27 To assess the associations over time between potential explanatory variables (i.e. hospital  
28 type, ward type, and administration time) and protocol compliance, separate univariate multilevel  
29 logistic regression analyses were conducted for four dependent variables: complete protocol  
30 compliance (yes/no), patient identification compliance (yes/no), hand hygiene compliance (yes/no),  
31 and check by a second nurse compliance (yes/no).[28] A three-level multilevel structure was used,  
32 whereby the observations were clustered within wards and the wards within hospitals. The  
33 explanatory variables were used as independent variables. The fixed effects for the first evaluation  
34 were the average value of the intercepts. The fixed effects for the second evaluation were the  
35 regression coefficients to the extent that the second evaluation deviated from the first evaluation. In  
36 all analyses, a corrected model was used with adjustment for the other two explanatory variables.  
37  
38

39  
40 In addition, the between hospital and ward level variance was split into two elements, one  
41 for the first, and one for the second evaluation. Also the covariation between both evaluations was  
42 modelled at the hospital and ward level. This resulted in intra class correlations (ICCs) for each  
43 evaluation separately, which indicated whether the relative contribution of the hospital and ward  
44 levels differed between both evaluations. Based on the variances and covariance, the correlation  
45 between participated wards was calculated.  
46  
47

48 Descriptive analyses were conducted using IBM SPSS Statistics 20 (IBM Corporation), and the  
49 multilevel analyses using MlwiN V.2.30 (University of Bristol). The multilevel logistic models were  
50 calculated using Penalized Quasi Likelihood (PQL) second order (or when this failed, first order), with  
51 constrained level 1 variance. For all analyses, p-values  $\leq 0.05$  were considered statistically significant.  
52  
53  
54  
55  
56  
57  
58

## RESULTS

In total, 372 IV medication administrations were observed, with a range of 20-28 observations per hospital (Table 2). Most observations had been conducted at general hospitals (57%), internal medicine (35%) and IC wards (35%), during the afternoon (65%), and of administrations by IV infusion (74%).

**Table 2:** Descriptive statistics of IV medication observations during the two evaluation studies.

|                                           | First evaluation<br>2011/2012<br>N observations (%) | Second evaluation<br>2015/2016<br>N observations (%) |
|-------------------------------------------|-----------------------------------------------------|------------------------------------------------------|
| <b>Number of observations</b>             | 2154                                                | 372                                                  |
| <b>Number of hospitals</b>                | 19                                                  | 16                                                   |
| <b>Range of observations per hospital</b> | 70 - 196                                            | 20 - 28                                              |
| <b>Type of hospital</b>                   |                                                     |                                                      |
| University                                | 297 (13.8%)                                         | 22 (5.9%)                                            |
| Tertiary                                  | 750 (34.8%)                                         | 139 (37.4%)                                          |
| General                                   | 1107 (51.4%)                                        | 211 (56.7%)                                          |
| <b>Type of department</b>                 |                                                     |                                                      |
| Internal Medicine                         | 643 (29.9%)                                         | 129 (34.7%)                                          |
| (General) Surgery                         | 771 (35.8%)                                         | 112 (30.1%)                                          |
| Intensive Care                            | 671 (31.2%)                                         | 131 (35.2%)                                          |
| Other                                     | 69 (3.2%)                                           | 0 (0%)                                               |
| <b>Administration time</b>                |                                                     |                                                      |
| Morning (6AM-12PM)                        | 771 (35.8%)                                         | 92 (24.7%)                                           |
| Afternoon (12PM-6PM)                      | 1257 (58.4%)                                        | 243 (65.3%)                                          |
| Evening (after 6PM)                       | 126 (5.8%)                                          | 37 (9.9%)                                            |
| <b>Type of medication (most common)</b>   |                                                     |                                                      |
| Antibiotics                               | 1323 (61.4%)                                        | 236 (63.4%)                                          |
| Analgesics                                | 167 (7.8%)                                          | 38 (10.2%)                                           |
| Gastrointestinal medication               | 178 (8.3%)                                          | 16 (4.3%)                                            |
| Anesthetics                               | 27 (1.3%)                                           | 16 (4.3%)                                            |
| Electrolytes                              | 83 (3.9%)                                           | 14 (3.8%)                                            |
| Corticosteroids                           | 85 (3.9%)                                           | 11 (3.0%)                                            |
| <b>Type of administration</b>             |                                                     |                                                      |
| By IV syringe pump                        | 29 (1.3%)                                           | 48 (12.9%)                                           |
| By bolus IV injection                     | 66 (3.1%)                                           | 51 (13.7%)                                           |
| By IV infusion                            | 2059 (95.6%)                                        | 273 (73.4%)                                          |

Data is presented as n (%), unless stated otherwise. IV = Intravenous

### Protocol compliance

Table 3 shows the mean number of correctly conducted protocol proceedings and percentages of IV medication administrations with complete protocol compliance during both evaluations. On average, more proceedings per IV medication administration were conducted during the second evaluation compared with the first evaluation: 7.6 (95% Confidence Interval (CI):7.5-7.7) versus 7.3 (CI:7.3-7.4),

( $p < 0.001$ ). However, no significant change was seen in complete protocol compliance during the second evaluation compared with the first evaluation: 22.3% (CI:18.1%-26.5%) versus 19.4% (CI:17.7%-21.1%), ( $p = 0.194$ ).

**Table 3:** Comparison of the first and second evaluation study in conducting the complete protocol.

|                                      | First evaluation<br>2011/2012 | Second evaluation<br>2015/2016 | p-value |
|--------------------------------------|-------------------------------|--------------------------------|---------|
| Conducted proceedings, mean (CI)     | 7.3 (7.3-7.4)                 | 7.6 (7.5-7.7)                  | <0.001* |
| Complete protocol compliance, % (CI) | 19.4 (17.7-21.1)              | 22.3 (18.1-25.5)               | 0.194†  |

\* tested by one-way analysis of variances (ANOVA) test, † tested by Chi-Square ( $\chi^2$ ) test, CI = 95% Confidence Interval

Three proceedings were least often conducted: 'patient identification' (80.1%), 'hand hygiene' (63.2%), and 'check by a second nurse' (47.3%)(Figure 1). Compliance rates with the other six proceedings varied between 93% and 100%.

Compliance with 'patient identification' improved significantly from 61% (CI:58.0%-62.1%) in the first evaluation to 80% (CI:76.1%-84.2%) in the second evaluation,  $p < 0.001$ . During the second evaluation, patient identification was conducted in three ways. First, 49% of the nurses identified their patient by a physical check (e.g. asking the patients' name, and/or date of birth, or by checking information on the patients' wristband). Second, 16% of the nurses identified the patient by using a barcode scanner in addition to the physical check, or by only using a barcode scanner. Third, in 15% of the observations, all on IC wards, nurse-patient ratio was one nurse per patient. Hence, patient identification was scored as conducted in all these observations.

Compliance with the proceedings 'hand hygiene', and 'check by a second nurse' remained unchanged. The 'check by a second nurse' comprises of four sub-checks: double check on 'right patient', 'right medication', 'right administration route' and 'right administration rate'. During the second evaluation, double checking the right 'patient' ( $n = 255$ , 69%), 'administration route' ( $n = 227$ , 61%) and 'administration rate' ( $n = 177$ , 48%) were conducted less often compared to double checking the right 'medication' ( $n = 353$ , 95%).

#### Factors associated with protocol compliance

The univariate associations over time between three potential explanatory variables (e.g. type of hospital, ward type, and time of administration) and four dependent variables (complete protocol compliance, compliance with patient identification, compliance with hand hygiene, and compliance with check by a second nurse), were investigated. A positive association was found between all three explanatory variables and compliance with 'patient identification'. Compliance with the proceeding 'patient identification' improved significantly over time for all the different administration times (morning, afternoon, and evening)(Table 4), all the different ward types (intensive care, internal medicine, and (general) surgery)(Supplementary Table 1), and in tertiary teaching hospitals (Supplementary Table 2). Other investigated hospital and administration related variables were not associated with complete protocol compliance or compliance with the other two analyzed individual proceedings. Furthermore, multilevel analyses showed that the hospital variance became very small and was estimated as 0 (Table 4). On the other hand, ward variance increased. For example, 0% (ICC=0.00) of the total variance in the association between 'patient identification compliance' and

'administration time' can be explained by individual hospitals and 50% (ICC=49.70) by individual wards (Table 4). During the first evaluation, opposite results were found, in which the ICCs of hospital variance were high, and ICCs of ward variance were low. In addition, at ward level, the correlation between the two evaluations was 0.52, indicating that wards having had a high compliance in the first evaluation, also had a high compliance in the second evaluation. Vice versa, wards that had a low compliance in the first evaluation, also had a low compliance in the second evaluation.

**Table 4:** Multilevel analyses of the association between administration time and compliance with the preceding 'patient identification' during the first and second evaluation.

|                                             | First evaluation<br>2011/2012 |                   | Second evaluation<br>2015/2016 |               |
|---------------------------------------------|-------------------------------|-------------------|--------------------------------|---------------|
|                                             | N                             | Estimate (SE)     | N                              | Estimate (SE) |
| <b>Fixed effects</b>                        |                               |                   |                                |               |
| Patient identification in morning           | 770                           | 0.19 (0.46)       | 92                             | 1.97 (0.61)*  |
| Patient identification in afternoon         | 1256                          | 0.39 (0.45)       | 243                            | 1.58 (0.53)*  |
| Patient identification in evening           | 126                           | 0.39 (0.55)       | 37                             | 1.64 (0.76)*  |
| <b>Random effects</b>                       |                               |                   |                                |               |
| Hospital level ICC                          |                               | 38.09             |                                | 0             |
| Hospital level variance                     |                               | 3.24 (1.21)       |                                | 0 (0)         |
| Hospital level covariance and correlation   |                               | 0 (0); 0          |                                |               |
| Department level ICC                        |                               | 23.27             |                                | 49.70         |
| Department level variance                   |                               | 1.13 (0.34)       |                                | 2.40 (0.78)   |
| Department level covariance and correlation |                               | 0.85 (0.46); 0.52 |                                |               |

\* $p < 0.05$ , ICC=Intra Class Correlation, SE=Standard Error

### Improvement strategies implemented to increase protocol compliance

Figure 2 shows nine identified strategies implemented by hospitals with the aim to improve compliance with the injectable medication administration protocol. Most strategies were classified according to the SEIPS model as targeting the organization component (n=3), followed by tasks (n=2), and technology and tools components (n=2). Only one intervention targeted the person and one the environment component.

Hospitals implemented on average six strategies, ranging between four and nine strategies. Organization component strategies were: appointing an injectable medication champion (15 participating hospitals), conducting internal audits (14 participating hospitals), and having a buddy-system in which two nurses double check their buddies' IV medication administrations (9 participating hospitals). Most appointed injectable medication champions were hospital pharmacists and the way in which this task was performed varied greatly between hospitals. Barcode medication administration (BCMA) systems (8 participating hospitals), and smart pumps (7 participating hospitals) were the implemented tools & technology improvement strategies. Smart pumps are infusion pumps with software that creates a library of medication administration protocols.[29] A personal component related strategy included training and education (e.g. e-learning modules, and introduction modules) for nurses to enhance their knowledge (16 participating hospitals). Task related strategies included: shifting the tasks of injectable medication preparation from nurses on hospital wards to pharmacy technicians in the (central) hospital pharmacy (11 participating hospitals) and adjusting the timing of the check by a second nurse to the beginning of a shift (10 participating hospitals). Finally, having policy regarding the recognisability of nurses during injectable medication

1  
2  
3 administration (12 participating hospitals) was the only environmental component related strategy  
4 identified. Most combined strategies were training and education, and appointing an injectable  
5 medication champion.  
6  
7  
8  
9  
10  
11  
12  
13  
14  
15  
16  
17  
18  
19  
20  
21  
22  
23  
24  
25  
26  
27  
28  
29  
30  
31  
32  
33  
34  
35  
36  
37  
38  
39  
40  
41  
42  
43  
44  
45  
46  
47  
48  
49  
50  
51  
52  
53  
54  
55  
56  
57  
58  
59  
60

For peer review only

## DISCUSSION

Compliance with individual proceedings of the Dutch protocol on administering injectable medication has improved over four years, but complete protocol compliance did not significantly change. In 19% of the observations in 2011/2012, the protocol was completely conducted, compared to 22% in 2015/2016 ( $p=0.194$ ). In contrast to the first evaluation study, differences in protocol compliance between wards were greater, and differences between hospitals were smaller. Furthermore, according to the SEIPS model, most improvement strategies targeted the organization component of the injectable medication administration process.

Compliance with the proceeding 'patient identification' increased significantly to an average of 80%. Using a BCMA system to electronically identify patients may have contributed to the higher compliance rate of this proceeding in our study. Taliercio et al. (2014) showed that nurses experience using a BCMA system to identify patients as a major advantage.[30] In our study, a BCMA system was implemented as a strategy in eight (50%) participating hospitals, and used in 16% of all observations. Since an increasing number of Dutch hospitals will implement a BCMA system in the next few years and using BCMA will be further integrated in daily nursing practice, we expect that compliance with this proceeding will further increase. A reason for non-compliance with this proceeding can be that nurses believe they know their patient well enough not to ask the patients' name and date of birth.[31] Other observational studies on medication administration reported lower compliance rates (33%-80%), but did not specify whether identification was supported by a BCMA system.[15, 16, 32-35]

Compliance with the proceeding 'hand hygiene' remained unchanged (63%). This may be explained by the lack of improvement strategies specifically targeting hand hygiene compliance in the participating hospitals. The compliance of 63% in our study is comparable to the study of Helder et al. (2016) which showed a hand disinfection rate during medication administration of 58% after a mutual feedback intervention.[36] Improving hand hygiene remains a challenge in many hospital processes, not only during medication administration. A recent review showed that the overall mean hand hygiene compliance rate after interventions was 57%.[37] Huis et al. (2012) explored determinants of hand hygiene improvement strategies and showed that addressing knowledge, awareness, action control, and facilitation is not enough to improve hand hygiene compliance.[38] Baseline compliance rates of hand hygiene vary strongly in the literature (20-60%).[39] Also, the increased compliance with hand hygiene appears temporary in most intervention studies. Huis et al. (2012) recommended that social influence, attitude, self-efficacy, and attention (person component of SEIPS) should be taken into account in new strategies, and that they should preferably be focused on the whole nursing team.[38]

Compliance with the proceeding 'check by a second nurse' also remained unchanged (47%). Of all four sub-checks of this proceeding (e.g. 'right patient', 'right medication', 'right administration route', and 'right administration rate'), the sub-checks on 'right patient' and 'right medication' were most often conducted. These sub-checks are supported by barcode scanning systems while the sub-checks on 'right administration route' and 'right administration rate' are not. Therefore, for these checks on route and rate of IV infusion, a second nurse at the patients' bedside was necessary. This is a task that depends on nurse capacity and/or workload. In theory, the check by a second nurse for all IV medications has become a standard and critical proceeding. Alsulami et al. (2012) described that

1  
2  
3 most healthcare professionals prefer the double check, but that staff shortage can prevent for  
4 correctly conducting this proceeding.[40] In practice, we observed that increased workload, indeed,  
5 may prevent this standard. Therefore, this proceeding must be prioritized in future studies. In order  
6 to facilitate the check by a second nurse, intervention strategies such as adjusting the timing of the  
7 check by a second nurse (10 hospitals) and having a buddy-system (9 hospitals) have been  
8 implemented in the participating hospitals. However, qualitative studies on the check by a second  
9 nurse showed that the focus should lie on training and education, automating the proceeding, and  
10 seeing the check by a second nurse as a method to share opinions.[41]  
11  
12

13  
14 Using the SEIPS model for classifying strategies implemented by the hospitals revealed that  
15 most strategies targeted the organization of the injectable medication administration process. Less  
16 strategies targeted the person and environment. This is in contrast with Berdot et al. (2015), who  
17 showed that most interventions aiming to reduce MAEs targeted technology and tools (e.g.  
18 automated medication dispensing systems, BCMA systems) and the person (e.g. interactive CD-ROM  
19 program, or simulation-based learning).[42] This can be explained by the fact that Berdot et al.  
20 (2012) included only seven studies, mostly randomized controlled trials, which had MAE rates as  
21 outcome measure. Our observational study identified current improvement strategies used in daily  
22 practice. Knowing that strategies are most often complex and multifaceted, it is recommended to  
23 determine potential barriers prior to implementing a strategy.[42] These barriers can be found in all  
24 SEIPS components. Apparently, Dutch hospitals have been trying to overcome barriers in the  
25 injectable medication process by implementing mostly organizational strategies on hospital level.  
26 This is, however, not enough to increase protocol compliance. Since most variation was seen on ward  
27 level, rather than hospital level, future strategies should be tailored to individual wards. It is  
28 important to focus these strategies on individuals (e.g. nurses, patients, families) and the  
29 environment. On the other hand, the protocol itself can also be a focus for discussion. Since two  
30 evaluation studies concluded that the implementation of the protocol has not yet been  
31 accomplished, it may be necessary to take a critical look at which proceedings are essential, and  
32 whether the proceedings reflect all SEIPS components.  
33  
34  
35  
36  
37

38 One of the strengths of this study is that more than 20% of all Dutch hospitals participated in  
39 one of the two evaluation studies, 19 during the first evaluation, and 16 during the second  
40 evaluation. This random and representative sample ensures that the results can be generalized to  
41 the Dutch hospital setting. Furthermore, a similar observation list, observation procedure, and  
42 training of researchers were used during both evaluations and 13 hospitals participated in both  
43 evaluations. Therefore, we could compare the two evaluations reliably. However, several  
44 uncertainties may have limited the generalizability of our results. Firstly, this second study comprised  
45 of one data collection moment compared to 10 data collection moments in 2011/2012. As a  
46 consequence, the compliance rate reflect one moment in time, compared with an average  
47 compliance rate. Nevertheless, we conducted more than the intended 300 observations, and on this  
48 basis, we think the results reflect current nursing practice. Secondly, almost all observations (96%)  
49 were conducted by one researcher, which could have created error of leniency or severity (i.e. rating  
50 observations in particular positively or negatively).[43] However, in our study, using one observer  
51 ensured that all administrations were measured in the same way and it appeared that the  
52 compliance rates were in line with previous studies. Thirdly, no data about nurse-related  
53 characteristics (degree of education and years of experience) and workload-related characteristics  
54  
55  
56  
57  
58  
59  
60



1  
2  
3 (turnover rates, stability of the nursing workforce, stability of the nurse-to-patient ratio over the  
4 years, and number of drugs to be dispensed per round per nurse) have been collected. This may have  
5 resulted in an incomplete overview of factors associated with protocol compliance. The nurse-related  
6 characteristics have not been collected because we used the same observation form as in the first  
7 evaluation which did not include these characteristics. The workload-related characteristics have not  
8 been collected because these data appeared too complex and the way these variables are calculated  
9 varied per ward and per hospital. Fourthly, not all injectable medications were included in the  
10 observations, only IV medications. Since chemotherapy, and less invasive injectable medication  
11 administration routes, such as intramuscular and subcutaneous injections, are increasingly used in  
12 hospitals, it would be recommendable to also observe administration of these types of injectable  
13 medications in the future. Fifthly, the fact that nurses were aware of being observed may have  
14 resulted in more compliance. As a consequence, compliance rates could have been overestimated.  
15 This so called Hawthorne effect is a known challenge within observational studies.[44] To minimize  
16 this effect in our study, the researcher was discrete during observations and did not give  
17 performance feedback during or after observations. Finally, since the information about  
18 implemented improvement strategies was collected during two interviews, it is uncertain how well  
19 these strategies are implemented in daily practice on the wards. Therefore, this information provides  
20 only a first impression. To be able to determine associations between strategies and protocol  
21 compliance, we would recommend to perform a new study aiming to observe the execution of the  
22 mentioned strategies on the wards.  
23  
24  
25  
26  
27

28 In conclusion, our results show that conducting all nine proceedings included in the protocol  
29 for safe injectable medication administration by Dutch hospital nurses remains challenging.  
30 Importantly, compliance with patient identification during IV medication administration has  
31 improved and implementing BCMA systems may have contributed to this finding. Therefore, further  
32 implementation of BCMA systems in hospitals is recommended. Compliance with 'hand hygiene', and  
33 'check by a second nurse' need to be further improved in order to increase complete protocol  
34 compliance and reduce the risk of MAEs. To improve compliance with these proceedings, other  
35 interventions are needed, preferably focused on nurses, and individually tailored to each ward.  
36  
37  
38  
39  
40  
41  
42  
43  
44  
45  
46  
47  
48  
49  
50  
51  
52  
53  
54  
55  
56  
57  
58  
59  
60

1  
2  
3 **Acknowledgements** The authors gratefully acknowledge all participating hospitals, and the nurse  
4 interns, and pharmacy intern for their cooperation during the data collection. We also acknowledge  
5 Catherine Combee - Duffy, MANP for critical reading the article as native speaker.  
6

7  
8 **Contributors** BS, JK, MdB, and CW designed the study and developed the study protocol. BS and JK  
9 organized the data collection. BS conducted the observations. BS, JK, and PS performed statistical  
10 analyses and interpreted the analytical results. BS, JK, and IJ wrote the manuscript. JK, MdB, and CW  
11 supervised the study. All authors made critical revisions and approved the final version of the  
12 manuscript.  
13

14  
15 **Funding** This work was supported by the Dutch Ministry of Health, Welfare, and Sports.  
16

17 **Competing Interests** None.  
18

19  
20 **Ethics approval** This study has been approved by the Medical Ethics Committee of the VU University  
21 Medical Center Amsterdam, with protocol number 2015/430. The protocol number of the first  
22 evaluation study was 2011/359 and has been approved by the same Medical Ethics Committee.  
23

24  
25 **Provenance and peer review** Not commissioned; externally peer reviewed.  
26

27 **Data sharing statement** No additional data are available.  
28

29  
30 **Open Access** This is an Open Access article distributed in accordance with the Creative Commons  
31 Attribution Non Commercial (CC BY-NC 4.0) license, which permits others to distribute, remix, adapt,  
32 build upon this work non-commercially, and license their derivative works on different terms,  
33 provided the original work is properly cited and the use is non-commercial. See:  
34 <http://creativecommons.org/licenses/by-nc/4.0/>  
35  
36  
37  
38  
39  
40  
41  
42  
43  
44  
45  
46  
47  
48  
49  
50  
51  
52  
53  
54  
55  
56  
57  
58  
59  
60

**REFERENCES**

- 1 Institute for Safe Medication Practices (ISMP). Safe Practice Guidelines for Adult IV Push Medications. A compilation of safe practices from the ISMP Adult IV Push Medication Safety Summit. 2015. <http://www.ismp.org/Tools/guidelines/ivsummitpush/ivpushmedguidelines.pdf> (accessed 23 Aug 2017).
- 2 Doyle GR, McCutcheon JA. Clinical Procedures for Safer Patient Care. Burnaby, Canada: British Columbia Institute of Technology (BCIT), 2015.
- 3 Hughes RG, Blegen MA. Medication Administration Safety In: Hughes RG, ed. Patient Safety and Quality: An Evidence-Based Handbook for Nurses. Rockville MD: Agency for Healthcare Research and Quality, March 2008.
- 4 McLeod MC, Barber N, Franklin BD. Methodological variations and their effects on reported medication administration error rates. *BMJ Qual Saf* 2013;22:278-89.
- 5 Keers RN, Williams SD, Cooke J, et al. Understanding the causes of intravenous medication administration errors in hospitals: a qualitative critical incident study. *BMJ Open* 2015;5:e005948.
- 6 McDowell SE, Mt-Isa S, Ashby D, et al. Republished paper: Where errors occur in the preparation and administration of intravenous medicines: a systematic review and Bayesian analysis. *Postgrad Med J* 2010;86:734-8.
- 7 Taxis K, Barber N. Causes of intravenous medication errors: an ethnographic study. *Qual Saf Health Care* 2003;12:343-7.
- 8 Roelofsen EE, Schuitenmaker MG, Swart EL, et al. Veiligheid op recept: een protocol voor toediening gereed maken van parenteralia voor verpleegkundigen. *Pharma Weekbl* 2007;142:162-6.
- 9 van den Bemt PM, Fijn R, van der Voort PH, et al. Frequency and determinants of drug administration errors in the intensive care unit. *Crit Care Med* 2002;30:846-50.
- 10 Tromp M, Natsch S, van Achterberg T. The preparation and administration of intravenous drugs before and after protocol implementation. *Pharm World Sci* 2009;31:413-20.
- 11 Nguyen HT, Pham HT, Vo DK, et al. The effect of a clinical pharmacist-led training programme on intravenous medication errors: a controlled before and after study. *BMJ Qual Saf* 2014;23:319-24.
- 12 Chedoe I, Molendijk H, Hospes W, et al. The effect of a multifaceted educational intervention on medication preparation and administration errors in neonatal intensive care. *Arch Dis Child Fetal Neonatal Ed* 2012;97:F449-55.
- 13 VMS. High Risk Medication: preparation and administration of parenteralia. Oct 2009. [http://www.vmszorg.nl/\\_library/5361/2009.0108\\_praktijkids\\_high\\_risk.pdf](http://www.vmszorg.nl/_library/5361/2009.0108_praktijkids_high_risk.pdf) (accessed 30 Jun 2016).
- 14 Kim J, Bates DW. Medication administration errors by nurses: adherence to guidelines. *J Clin Nurs* 2013;22:590-8.
- 15 Choo J, Johnston L, Manias E. Nurses' medication administration practices at two Singaporean acute care hospitals. *Nurs Health Sci* 2013;15:101-8.
- 16 Alemanni J, Touzin K, Bussieres JF, et al. An assessment of drug administration compliance in a university hospital centre. *J Eval Clin Pract* 2010;16:920-6.
- 17 Schilp J, Boot S, de Blok C, et al. Protocol compliance of administering parenteral medication in Dutch hospitals: an evaluation and cost estimation of the implementation. *BMJ Open* 2014;4:e005232.
- 18 de Blok C, Koster E, Schilp J, et al. Implementation VMS Safety Program: Evaluation study in Dutch hospitals. (in Dutch: Implementatie VMS Veiligheidsprogramma: Evaluatieonderzoek in Nederlandse ziekenhuizen). 2013. <https://www.nivel.nl/sites/default/files/bestanden/Rapport-Implementatie-VMS-Veiligheidsprogramma.pdf> (accessed 10 Jul 2017).

- 1  
2  
3 19 Poon EG, Keohane CA, Yoon CS, et al. Effect of bar-code technology on the safety of medication  
4 administration. *N Engl J Med* 2010;362:1698-707.
- 5 20 Francke AL, Smit MC, de Veer AJ, et al. Factors influencing the implementation of clinical  
6 guidelines for health care professionals: a systematic meta-review. *BMC Med Inform Decis Mak*  
7 2008;8:38.
- 8 21 Borgert MJ, Goossens A, Dongelmans DA. What are effective strategies for the implementation of  
9 care bundles on ICUs: a systematic review. *Implement Sci* 2015;10:119.
- 10 22 von Elm E, Altman DG, Egger M, et al. The Strengthening the Reporting of Observational Studies in  
11 Epidemiology (STROBE) statement: guidelines for reporting observational studies. *J Clin Epidemiol*  
12 2008;61:344-9.
- 13 23 Dean B, Barber N. Validity and reliability of observational methods for studying medication  
14 administration errors. *Am J Health Syst Pharm* 2001;58:54-9.
- 15 24 Carayon P, Schoofs Hundt A, Karsh BT, et al. Work system design for patient safety: the SEIPS  
16 model. *Qual Saf Health Care* 2006;15 Suppl 1:i50-8.
- 17 25 Frith KH. Medication errors in the intensive care unit: literature review using the SEIPS model.  
18 *AACN Adv Crit Care* 2013;24:389-404.
- 19 26 Al-Jumaili AA, Doucette WR. Comprehensive Literature Review of Factors Influencing Medication  
20 Safety in Nursing Homes: Using a Systems Model. *J Am Med Dir Assoc* 2017;18:470-88.
- 21 27 Carayon P, Wetterneck TB, Rivera-Rodriguez AJ, et al. Human factors systems approach to  
22 healthcare quality and patient safety. *Appl Ergon* 2014;45:14-25.
- 23 28 Snijders TAB, Bosker RJ. Multilevel Analysis: An Introduction to Basic and Advanced Multilevel  
24 Modeling. 2nd ed. London: Sage Publishers, 2012.
- 25 29 Institute for Safe Medication Practices (ISMP). Proceedings from the ISMP summit on the use of  
26 smart infusion pumps: guidelines for safe implementation and use. 2009.  
27 <https://www.ismp.org/tools/guidelines/smartpumps/printerversion.pdf> (accessed 12 Jul 2017).
- 28 30 Taliercio V, Schachner B, Borbolla D, et al. The expectations of nurses about the implementation  
29 of a Barcoded Medication Administration System: a qualitative study. *Stud Health Technol Inform*  
30 2014;205:191-5.
- 31 31 Dougherty L, Sque M, Crouch R. Decision-making processes used by nurses during intravenous  
32 drug preparation and administration. *J Adv Nurs* 2012;68:1302-11.
- 33 32 Barthelemy I, Huet E, Guilbeault M, et al. Compliance with inpatient drug use process steps: a  
34 cross-sectional observational study. *J Pharm Pract* 2013;26:551-5.
- 35 33 Raja Lope RJ, Boo NY, Rohana J, et al. A quality assurance study on the administration of  
36 medication by nurses in a neonatal intensive care unit. *Singapore Med J* 2009;50:68-72.
- 37 34 Westbrook JI, Rob MI, Woods A, et al. Errors in the administration of intravenous medications in  
38 hospital and the role of correct procedures and nurse experience. *BMJ Qual Saf* 2011;20:1027-34.
- 39 35 Harkanen M, Kervinen M, Ahonen J, et al. An observational study of how patients are identified  
40 before medication administrations in medical and surgical wards. *Nurs Health Sci* 2015;17:188-94.
- 41 36 Helder OK, Kornelisse RF, Reiss IK, et al. Disinfection practices in intravenous drug administration.  
42 *Am J Infect Control* 2016;44:721-3.
- 43 37 Kingston L, O'Connell NH, Dunne CP. Hand hygiene-related clinical trials reported since 2010: a  
44 systematic review. *J Hosp Infect* 2016;92:309-20.
- 45 38 Huis A, van Achterberg T, de Bruin M, et al. A systematic review of hand hygiene improvement  
46 strategies: a behavioural approach. *Implement Sci* 2012;7:92.
- 47  
48  
49  
50  
51  
52  
53  
54  
55  
56  
57  
58  
59  
60

- 1  
2  
3 39 Erasmus V, Daha TJ, Brug H, et al. Systematic review of studies on compliance with hand hygiene  
4 guidelines in hospital care. *Infect Control Hosp Epidemiol* 2010;31:283-94.  
5 40 Alsulami Z, Conroy S, Choonara I. Double checking the administration of medicines: what is the  
6 evidence? A systematic review. *Arch Dis Child* 2012;97:833-7.  
7 41 Hewitt T, Chreim S, Forster A. Double checking: a second look. *J Eval Clin Pract* 2016;22:267-74.  
8 42 Berdot S, Roudot M, Schramm C, et al. Interventions to reduce nurses' medication administration  
9 errors in inpatient settings: A systematic review and meta-analysis. *Int J Nurs Stud* 2016;53:342-50.  
10 43 Polit DF, Beck CT. Nursing Research. Generating and Assessing Evidence for Nursing Practice. 8th  
11 ed. Philadelphia: Wolters Kluwer/Lippincott/Williams & Wilkins, 2008:414-448.  
12 44 McCambridge J, Witton J, Elbourne DR. Systematic review of the Hawthorne effect: new concepts  
13 are needed to study research participation effects. *J Clin Epidemiol* 2014;67:267-77.  
14  
15  
16  
17  
18  
19  
20  
21  
22  
23  
24  
25  
26  
27  
28  
29  
30  
31  
32  
33  
34  
35  
36  
37  
38  
39  
40  
41  
42  
43  
44  
45  
46  
47  
48  
49  
50  
51  
52  
53  
54  
55  
56  
57  
58  
59  
60

1  
2  
3 **Figure legends: (uploaded as separate files)**

4 **Figure 1:** Compliance percentages with the complete protocol and three individual proceedings within  
5 the first (n=2154) and second (n=372) evaluation.<sup>†</sup>

6 Results are presented with 95% Confidence Interval. † = tested by Chi-square ( $\chi^2$ ) test. Compliance  
7 with the six other proceedings varied between 93%-100%, and was significantly increased for  
8 'prepare administration', 'check flow infusion', and 'check pump mode', and significantly decreased  
9 for 'check medication'.  
10

11  
12 **Figure 2:** Identified strategies implemented by the hospitals during the second evaluation (n=16  
13 hospitals), classified according to the individual components of the SEIPS model (e.g. organization,  
14 technology & tools, person, tasks, and environment). BCMA = Barcode Medication Administration.  
15  
16  
17  
18  
19  
20  
21  
22  
23  
24  
25  
26  
27  
28  
29  
30  
31  
32  
33  
34  
35  
36  
37  
38  
39  
40  
41  
42  
43  
44  
45  
46  
47  
48  
49  
50  
51  
52  
53  
54  
55  
56  
57  
58  
59  
60

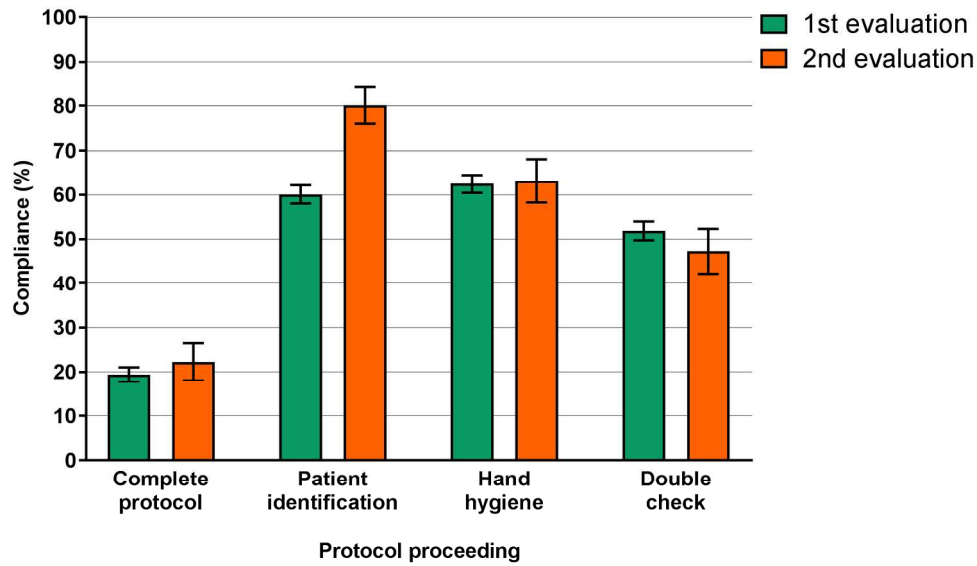

**Figure 1:** Compliance percentages with the complete protocol and three individual proceedings within the first (n=2154) and second (n=372) evaluation.<sup>†</sup> Results are presented with 95% Confidence Interval. † = tested by Chi-square ( $X^2$ ) test. Compliance with the six other proceedings varied between 93%-100%, and was significantly increased for 'prepare administration', 'check flow infusion', and 'check pump mode', and significantly decreased for 'check medication'.

201x120mm (300 x 300 DPI)

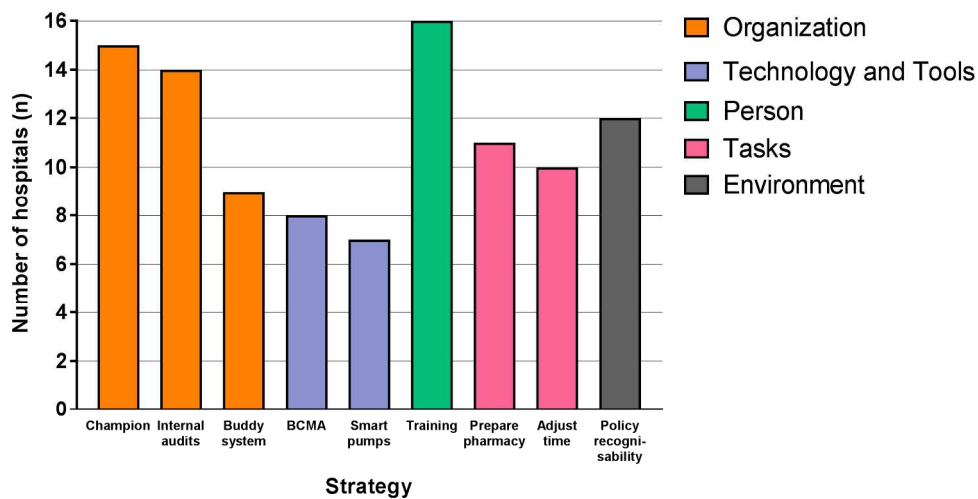

**Figure 2:** Identified strategies implemented by the hospitals during the second evaluation (n=16 hospitals), classified according to the individual components of the SEIPS model (e.g. organization, technology & tools, person, tasks, and environment). BCMA = Barcode Medication Administration.

215x114mm (300 x 300 DPI)

Review only



**Supplementary Table 1:** Multilevel analyses of the association between ward type and compliance with the preceding 'patient identification' during the first and second evaluation.

|                                                  | First evaluation<br>2011/2012 |                   | Second evaluation<br>2015/2016 |               |
|--------------------------------------------------|-------------------------------|-------------------|--------------------------------|---------------|
|                                                  | N                             | Estimate (SE)     | N                              | Estimate (SE) |
| <b>Fixed effects</b>                             |                               |                   |                                |               |
| Patient identification on internal medicine ward | 643                           | -0.05 (0.51)      | 129                            | 1.58 (0.64)*  |
| Patient identification on surgery ward           | 771                           | 0.27 (0.50)       | 112                            | 2.13 (0.67)*  |
| Patient identification on intensive care ward    | 671                           | 0.74 (0.51)       | 131                            | 1.32 (0.65)*  |
| <b>Random effects</b>                            |                               |                   |                                |               |
| Hospital level ICC                               |                               | 38.42             |                                | 0             |
| Hospital level variance                          |                               | 3.28 (1.22)       |                                | 0 (0)         |
| Hospital level covariance and correlation        |                               | 0 (0); 0          |                                |               |
| Department level ICC                             |                               | 23.09             |                                | 48.33         |
| Department level variance                        |                               | 1.14 (0.34)       |                                | 2.24 (0.75)   |
| Department level covariance and correlation      |                               | 0.83 (0.46); 0.52 |                                |               |

\* $p < 0.05$ , ICC=Intra Class Correlation, SE=Standard Error

**Supplementary Table 2:** Multilevel analyses of the association between hospital type and compliance with the preceding 'patient identification' during the first and second evaluation.

|                                                | First evaluation<br>2011/2012 |                   | Second evaluation<br>2015/2016 |               |
|------------------------------------------------|-------------------------------|-------------------|--------------------------------|---------------|
|                                                | N                             | Estimate (SE)     | N                              | Estimate (SE) |
| <b>Fixed effects</b>                           |                               |                   |                                |               |
| Patient identification in university hospitals | 297                           | 0.61 (1.35)       | 22                             | 2.56 (1.95)   |
| Patient identification in tertiary hospitals   | 750                           | 0.02 (0.72)       | 139                            | 2.09 (0.82)*  |
| Patient identification in general hospitals    | 1107                          | 0.45 (0.61)       | 211                            | 1.27 (0.68)   |
| <b>Random effects</b>                          |                               |                   |                                |               |
| Hospital level ICC                             |                               | 37.53             |                                | 0             |
| Hospital level variance                        |                               | 3.14 (1.18)       |                                | 0 (0)         |
| Hospital level covariance and correlation      |                               | 0 (0); 0          |                                |               |
| Department level ICC                           |                               | 23.18             |                                | 48.71         |
| Department level variance                      |                               | 1.12 (0.34)       |                                | 2.30 (0.76)   |
| Department level covariance and correlation    |                               | 0.82 (0.45); 0.52 |                                |               |

\* $p < 0.05$ , ICC=Intra Class Correlation, SE=Standard Error

**STROBE Statement**—Checklist of items that should be included in reports of *cross-sectional studies*

|                              | <b>Item No</b> | <b>Recommendation</b>                                                                                                                                                                                        | <b>Page number</b> |
|------------------------------|----------------|--------------------------------------------------------------------------------------------------------------------------------------------------------------------------------------------------------------|--------------------|
| <b>Title and abstract</b>    | 1              | (a) Indicate the study's design with a commonly used term in the title or the abstract                                                                                                                       | 1-2                |
|                              |                | (b) Provide in the abstract an informative and balanced summary of what was done and what was found                                                                                                          | 2                  |
| <b>Introduction</b>          |                |                                                                                                                                                                                                              |                    |
| Background/rationale         | 2              | Explain the scientific background and rationale for the investigation being reported                                                                                                                         | 4                  |
| Objectives                   | 3              | State specific objectives, including any prespecified hypotheses                                                                                                                                             | 5                  |
| <b>Methods</b>               |                |                                                                                                                                                                                                              |                    |
| Study design                 | 4              | Present key elements of study design early in the paper                                                                                                                                                      | 6                  |
| Setting                      | 5              | Describe the setting, locations, and relevant dates, including periods of recruitment, exposure, follow-up, and data collection                                                                              | 6                  |
| Participants                 | 6              | (a) Give the eligibility criteria, and the sources and methods of selection of participants                                                                                                                  | 6                  |
| Variables                    | 7              | Clearly define all outcomes, exposures, predictors, potential confounders, and effect modifiers. Give diagnostic criteria, if applicable                                                                     | 7-8                |
| Data sources/<br>measurement | 8*             | For each variable of interest, give sources of data and details of methods of assessment (measurement). Describe comparability of assessment methods if there is more than one group                         | 6-8                |
| Bias                         | 9              | Describe any efforts to address potential sources of bias                                                                                                                                                    | 14-15              |
| Study size                   | 10             | Explain how the study size was arrived at                                                                                                                                                                    | 7                  |
| Quantitative variables       | 11             | Explain how quantitative variables were handled in the analyses. If applicable, describe which groupings were chosen and why                                                                                 | 7-8                |
| Statistical methods          | 12             | (a) Describe all statistical methods, including those used to control for confounding                                                                                                                        | 8                  |
|                              |                | (b) Describe any methods used to examine subgroups and interactions                                                                                                                                          | 8                  |
|                              |                | (c) Explain how missing data were addressed                                                                                                                                                                  | n.a.               |
|                              |                | (d) If applicable, describe analytical methods taking account of sampling strategy                                                                                                                           | n.a.               |
|                              |                | (e) Describe any sensitivity analyses                                                                                                                                                                        | 8                  |
| <b>Results</b>               |                |                                                                                                                                                                                                              |                    |
| Participants                 | 13*            | (a) Report numbers of individuals at each stage of study—eg numbers potentially eligible, examined for eligibility, confirmed eligible, included in the study, completing follow-up, and analysed            | 9                  |
|                              |                | (b) Give reasons for non-participation at each stage                                                                                                                                                         | 6                  |
|                              |                | (c) Consider use of a flow diagram                                                                                                                                                                           | n.a.               |
| Descriptive data             | 14*            | (a) Give characteristics of study participants (eg demographic, clinical, social) and information on exposures and potential confounders                                                                     | 9                  |
|                              |                | (b) Indicate number of participants with missing data for each variable of interest                                                                                                                          | 9                  |
| Outcome data                 | 15*            | Report numbers of outcome events or summary measures                                                                                                                                                         | 9                  |
| Main results                 | 16             | (a) Give unadjusted estimates and, if applicable, confounder-adjusted estimates and their precision (eg, 95% confidence interval). Make clear which confounders were adjusted for and why they were included | 9-12               |

|                          |    |                                                                                                                                                                            |       |
|--------------------------|----|----------------------------------------------------------------------------------------------------------------------------------------------------------------------------|-------|
|                          |    | (b) Report category boundaries when continuous variables were categorized                                                                                                  | 9-12  |
|                          |    | (c) If relevant, consider translating estimates of relative risk into absolute risk for a meaningful time period                                                           | n.a.  |
| Other analyses           | 17 | Report other analyses done—eg analyses of subgroups and interactions, and sensitivity analyses                                                                             | 12    |
| <b>Discussion</b>        |    |                                                                                                                                                                            |       |
| Key results              | 18 | Summarise key results with reference to study objectives                                                                                                                   | 13    |
| Limitations              | 19 | Discuss limitations of the study, taking into account sources of potential bias or imprecision. Discuss both direction and magnitude of any potential bias                 | 14-15 |
| Interpretation           | 20 | Give a cautious overall interpretation of results considering objectives, limitations, multiplicity of analyses, results from similar studies, and other relevant evidence | 13-14 |
| Generalisability         | 21 | Discuss the generalisability (external validity) of the study results                                                                                                      | 14-15 |
| <b>Other information</b> |    |                                                                                                                                                                            |       |
| Funding                  | 22 | Give the source of funding and the role of the funders for the present study and, if applicable, for the original study on which the present article is based              | 16    |

n.a. = not applicable

\*Give information separately for exposed and unexposed groups.

**Note:** An Explanation and Elaboration article discusses each checklist item and gives methodological background and published examples of transparent reporting. The STROBE checklist is best used in conjunction with this article (freely available on the Web sites of PLoS Medicine at <http://www.plosmedicine.org/>, Annals of Internal Medicine at <http://www.annals.org/>, and Epidemiology at <http://www.epidem.com/>). Information on the STROBE Initiative is available at [www.strobe-statement.org](http://www.strobe-statement.org).
