# Supplementary material for: Nurse compliance with a protocol for safe injectable medication administration: comparison of two multicentre observational studies
Source: PubMed Central journal article supplement — BMJ Open. 2018 Jan 5;8(1):e019648. doi: 10.1136/bmjopen-2017-019648 (PMC5781013; doi:10.1136/bmjopen-2017-019648), 2018-01-05
Supplement: bmjopen-2017-019648supp001.pdf [file bmjopen-2017-019648supp001.pdf]

**Supplementary Table 1:** Multilevel analyses of the association between ward type and compliance with the preceding 'patient identification' during the first and second evaluation.

|                                                  | First evaluation<br>2011/2012 |                   | Second evaluation<br>2015/2016 |               |
|--------------------------------------------------|-------------------------------|-------------------|--------------------------------|---------------|
|                                                  | N                             | Estimate (SE)     | N                              | Estimate (SE) |
| <b>Fixed effects</b>                             |                               |                   |                                |               |
| Patient identification on internal medicine ward | 643                           | -0.05 (0.51)      | 129                            | 1.58 (0.64)*  |
| Patient identification on surgery ward           | 771                           | 0.27 (0.50)       | 112                            | 2.13 (0.67)*  |
| Patient identification on intensive care ward    | 671                           | 0.74 (0.51)       | 131                            | 1.32 (0.65)*  |
| <b>Random effects</b>                            |                               |                   |                                |               |
| Hospital level ICC                               |                               | 38.42             |                                | 0             |
| Hospital level variance                          |                               | 3.28 (1.22)       |                                | 0 (0)         |
| Hospital level covariance and correlation        |                               | 0 (0); 0          |                                |               |
| Department level ICC                             |                               | 23.09             |                                | 48.33         |
| Department level variance                        |                               | 1.14 (0.34)       |                                | 2.24 (0.75)   |
| Department level covariance and correlation      |                               | 0.83 (0.46); 0.52 |                                |               |

\* $p < 0.05$ , ICC=Intra Class Correlation, SE=Standard Error

**Supplementary Table 2:** Multilevel analyses of the association between hospital type and compliance with the preceding 'patient identification' during the first and second evaluation.

|                                                | First evaluation<br>2011/2012 |                   | Second evaluation<br>2015/2016 |               |
|------------------------------------------------|-------------------------------|-------------------|--------------------------------|---------------|
|                                                | N                             | Estimate (SE)     | N                              | Estimate (SE) |
| <b>Fixed effects</b>                           |                               |                   |                                |               |
| Patient identification in university hospitals | 297                           | 0.61 (1.35)       | 22                             | 2.56 (1.95)   |
| Patient identification in tertiary hospitals   | 750                           | 0.02 (0.72)       | 139                            | 2.09 (0.82)*  |
| Patient identification in general hospitals    | 1107                          | 0.45 (0.61)       | 211                            | 1.27 (0.68)   |
| <b>Random effects</b>                          |                               |                   |                                |               |
| Hospital level ICC                             |                               | 37.53             |                                | 0             |
| Hospital level variance                        |                               | 3.14 (1.18)       |                                | 0 (0)         |
| Hospital level covariance and correlation      |                               | 0 (0); 0          |                                |               |
| Department level ICC                           |                               | 23.18             |                                | 48.71         |
| Department level variance                      |                               | 1.12 (0.34)       |                                | 2.30 (0.76)   |
| Department level covariance and correlation    |                               | 0.82 (0.45); 0.52 |                                |               |

\* $p < 0.05$ , ICC=Intra Class Correlation, SE=Standard Error
